# A survey of *cis* regulatory non-coding RNA involved in bacterial virulence

1 **Mohammad Reza Naghdi<sup>1</sup>, Samia Djerroud<sup>1</sup>, Katia Smail<sup>1</sup> and Jonathan Perreault<sup>1,\*</sup>**

2 <sup>1</sup>INRS - Centre Armand-Frappier Santé Biotechnologie, 531 boul des Prairies, Laval (Québec), H7V  
3 1B7, Canada.

4 **\* Correspondence:**

5 Jonathan Perreault

6 jonathan.perreault@inrs.ca

7 **Keywords: Bacteria<sub>1</sub>, Virulence Factor<sub>2</sub>, Noncoding RNA<sub>3</sub>, Bioinformatics<sub>4</sub>, Cis-regulatory  
8 RNA<sub>5</sub>, ncRNA<sub>6</sub>, leader sequence<sub>7</sub> (Min.5-Max. 8)**

9 **Abstract**

10 Study of pathogenesis in bacteria is important to find new drug targets to treat bacterial infections.  
11 Pathogenic bacteria, including opportunists, express numerous so-called virulence genes to escape the  
12 host natural defenses and immune system. Regulation of virulence genes is often required for bacteria  
13 to infect their host. Such regulation can be achieved by *cis*-regulatory RNAs, like the metabolite-  
14 binding riboswitches or thermoregulators. In spite of the hundreds of RNA families annotated as *cis*-  
15 regulatory, there are relatively few examples of non-coding RNAs (ncRNAs) in 5'-UnTranslated  
16 Regions (UTRs) of bacteria described to regulate downstream virulence genes. To reassess the potential  
17 roles of such regulatory elements in bacterial pathogenesis, we collected genes important for virulence  
18 from different databases and evaluated the presence of ncRNAs in their UTRs to highlight the potential  
19 role of this type of gene regulation for virulence and, at the same time, get insight on some of the  
20 physical and chemical triggers of virulence.

## 21 **1 Introduction**

22 Virulence factors (VFs) are in large part responsible of the relative pathogenicity of bacteria and often  
23 counter the host immune system (Casadevall and Pirofski, 2003). The expression of VFs is controlled  
24 in accordance to environmental cues and signaling changes from the host (DiRita et al., 2000), or  
25 changes like temperature increase while moving from water to a mammalian host, or signals of  
26 microbiota living in the host, to give only a few examples (Bäumler and Sperandio, 2016) The  
27 communication between the host and microorganisms is known as inter-kingdom signaling and is  
28 crucial for activation of VFs which activates cascades of signaling pathways (Hughes and Sperandio,  
29 2008). For example, it has been shown that sensing a specific metabolite such as fucose in intestines is  
30 crucial for effective colonization (Pacheco et al., 2012). The importance of two component regulatory  
31 systems has also been shown, like PhoPQ in Mg<sup>2+</sup> sensing (García Véscovi et al., 1996, Véscovi et al.,  
32 1997) or QseC, a quorum-sensing regulator which detects eukaryote hormones for VF regulation  
33 (Clarke et al., 2006, Rasko et al., 2008). Other examples of physicochemical triggers include pH  
34 variation and quorum sensing that control expression of streptococcal pyrogenic exotoxin B (SpeB), a  
35 VF in *Streptococcus pyogenes* (Do et al., 2019).

36 Tight regulation of VFs improves the ability of pathogens to infect their host (Caldelari et al., 2013).  
37 Quick regulation is a key for successful pathogenicity, which is expected in a highly changing  
38 environment like hosts, especially when the latter react to the invasion (Fris and Murphy, 2016).

39 The regulation with RNA has been shown to be more effective than regulation with proteins in some  
40 contexts (Gripenland et al., 2010). Noncoding RNAs (ncRNAs) are a heterogeneous group of RNA that  
41 do not code for proteins but instead directly enact a function, often related to gene control. Regulation  
42 carried out by ncRNAs can impact one or several genes during transcription or translation (Eddy, 2001).  
43 The ncRNAs can be divided into two major groups as *cis*-regulatory or non *cis*-regulatory (*trans*) RNAs.  
44 *Cis*-regulatory RNAs are located mostly in the 5'-UnTranslated Regions (UTRs) of genes and have a  
45 direct effect on expression of the downstream gene. Regulation can occur at the transcriptional or  
46 translational level (Abduljalil, 2018). Good examples of *cis*-regulatory elements are riboswitches (Nahvi  
47 et al., 2002), RNA thermosensors (Morita et al., 1999) and T-boxes (Grundy and Henkin, 1993). For  
48 example, it has been shown that several VFs in *Listeria monocytogenes* are controlled by *cis*-regulatory  
49 RNAs such as riboswitches and thermoregulator RNAs (Lebreton and Cossart, 2017). The latter regulate  
50 the *prfA* gene (Johansson et al., 2002), a major regulator of virulence in *L. monocytogenes* (Leimeister-  
51 Wächterchter et al., 1990, Mengaud et al., 1991). *L. monocytogenes* also uses different flavors of a SAM  
52 riboswitch to regulate its virulence (Loh et al., 2009). The regulation of virulence genes *via* ncRNAs with  
53 a focus on sRNA was reviewed recently (Chakravarty and Massé, 2019). Here we evaluated *cis*-  
54 regulatory RNAs involved in regulation of virulence genes (VFs).

55 Increased use of RNAseq and improved bioinformatics prediction pipelines revealed numerous ncRNAs  
56 (Weinberg et al., 2010, Weinberg et al., 2017, Leonard et al., 2019, Stav et al., 2019) many of which we  
57 find may have an impact on virulence and may help expose more regulatory roles of ncRNAs *in vivo*  
58 (Hör et al., 2018). We used an exhaustive list of ncRNAs to explore their association to known virulence  
59 genes by combining data from different relational databases to provide a collection of *cis*-regulatory  
60 ncRNAs regulating VFs to assist research on virulence regulation.

## 61 **2 Materials and Methods**

### 62 **2.1 Bioinformatics**

63 In order to determine the existence of all *cis*-regulatory elements upstream of virulence genes, an  
64 exhaustive list of annotated VFs was established by using PATRIC database (Wattam et al., 2014) and  
65 two other databases: VFDB (Chen et al., 2016) and Victors (Sayers et al., 2019). The virulence is defined  
66 as a capacity of a bacteria to infect a host by using the VFs which help the bacteria colonize (Sharma et  
67 al., 2017) and escape the host immune system which results in infection and disease (Mao et al., 2015).  
68 However, VFs are also genes which do not affect the viability of bacteria outside their hosts (Brown et  
69 al., 2012).

70 Next, we looked for all *cis*-regulatory RNAs upstream of these genes by using the RiboGap database  
71 (Naghdi et al., 2017) and BLASTp (Altschul et al., 1990, Camacho et al., 2009). All the bacterial  
72 intergenic 5'-UTRs having ncRNAs (484,136 sequences) were extracted with their corresponding cds  
73 using RiboGap, i.e. all prokaryotic ncRNAs searched with cmsearch with Rfam's covariance models, as  
74 well as a few more RNAs (Supplementary Data). BLASTp was then used to determine homology

75 between genes downstream of ncRNAs and the list of VFs (9019 genes). PERL scripts (supplementary  
76 data) were used to analyze the results obtained by BLASTp. To avoid getting genes with common  
77 domains, but that are non-orthologous, the BLASTp condition was set to 98% coverage for High Scoring  
78 Pair (HSP). The BLASTp result was then sorted to keep hits with at least 60% identity. Only *cis*-  
79 regulatory RNAs on the same strand as the downstream gene were taken into account, except for tRNAs  
80 (see below).

## 81 **2.2 tRNA searches**

82 The tRNAs were searched separately. RNA distance from start codon of VF was also taken in  
83 consideration. The search was carried out for the same virulence genes as described above. Because all  
84 genomes harbor many tRNAs, numerous genes are expected to have tRNAs upstream of their coding  
85 sequences just by chance, so samples of genes (three replicas of 100 randomly chosen genes) were also  
86 used to put results in context. To evaluate the presence of pseudo-tRNAs and also obtain information on  
87 tRNA identity, tRNAscan-SE (Chan and Lowe, 2019) was used instead of RiboGap annotations, but  
88 RiboGap was used to fetch all the UTRs.

## 89 **2.2 Northern of co-transcribed tRNAs**

90 Three tRNAs were identified upstream of “Elongation Factor Tu” (*Ef-Tu*) gene in *Neisseria*. To determine  
91 whether this gene is transcribed alone or co-transcribed with the tRNAs upstream, we selected *Neisseria*  
92 *gonorrhoeae*, *Neisseria meningitidis*, *Neisseria sicca* and *Neisseria elongata*. Oligonucleotides  
93 complementary to each of the three tRNAs upstream of the *EF-Tu* cds and to the cds itself were ordered  
94 from IDT to probe the membrane (Table S1). Similarly, an oligonucleotide complementary to the tmRNA  
95 for the four *Neisseria* species was ordered from IDT and used as control.

96 Northern blots were performed as previously described (Perreault et al., 2011). In brief, total RNA of  
97 *Neisseria gonorrhoeae*, *Neisseria meningitidis* MC58\_NMB0124, *Neisseria sicca* and *Neisseria*  
98 *elongata* was migrated on a 6% polyacrylamide gel and then transferred onto nitrocellulose membrane  
99 (Amersham Hybond™ N<sup>+</sup> from GE healthcare). The oligonucleotides were labeled in 5' by using 5  
100 pmoles of oligonucleotide, 2 μL ATP ( $\gamma$ -<sup>32</sup>P), 1 μL of 10 U/μL polynucleotide T4 kinase and PNK buffer  
101 (NEB) in 20 μL, then incubated at 37°C for 1 h. The labeled products were then purified on denaturing  
102 6% polyacrylamide gel. The labeled oligonucleotides were incubated with the membrane for 24 hours at  
103 42° C in a rotating oven with hybridization buffer with SCC 5X prepared from SCC 20 X (175.3 g NaCl,  
104 88.2 g sodium citrate in 1 L, pH 7.0) and the day after washed twice with SCC 2X, 1 % SDS and SCC  
105 0.2 X, 0.1% SDS. Membranes were then exposed overnight on a phosphorimaging plate. The plate was  
106 scanned with a Typhoon FLA9500.

## 107 **3 Results**

### 108 **3.1 *cis*-regulatory RNA distribution upstream of virulence factors**

109 We decided to not limit our search to the genes listed as VFs in the PATRIC, Victors and VFBD databases.  
110 The focus of these databases is on experimentally validated VF genes and orthologs that follow stringent  
111 criteria (including similar genomic context), but can omit some orthologs in other pathogens. We even

112 extended our survey of cis-regulatory ncRNAs to non-pathogens because regulation of a gene in such  
113 species can still be informative for their VF orthologs in pathogenic counterparts, or between different  
114 pathogens. For example, a gene encoding a magnesium-translocating P-type ATPase is regulated by the  
115 *ykoK* Mg<sup>2+</sup> riboswitch in the non-pathogen *Lactococcus lactis* (Dann et al., 2007), by the Mg-sensor  
116 riboswitch in the pathogen *Salmonella enterica* (Cromie et al., 2006) or by the MgtC leader in *Klebsiella*  
117 *aerogenes* (Table 1 and S2 and S3) as well as the PhoP/PhoQ two component system (García Vescovi et  
118 al., 1996, Cromie et al., 2006), all indicative of a common regulatory signal, in spite of different  
119 mechanisms. Therefore, extending searches to VF orthologs may provide hints on the regulation of these  
120 genes in pathogens.

121 We found 95,943 genes associated with virulence (and orthologs) downstream of ncRNAs (Table 1 and  
122 Table S2). From these RNAs, we selected cis-regulatory RNAs (as annotated “type” in Rfam) based on  
123 the criteria described in materials and methods to produce compiled lists of RNA families already known  
124 to be *cis*-regulators (Table 1 and Tables S3, S4 and S5). This list includes 16 riboswitches for metabolites,  
125 14 thermoregulatory RNAs and 4 cation-associated regulators (Table 1), as well as many additional  
126 ncRNAs such as the T-boxes, leucine-operon leader or PyrD leader (1,473 hits in the latter case) (Table  
127 S5). The purine riboswitch was found to be the most common riboswitch among *cis*-regulatory RNAs  
128 (777 instance), whereas FMN and NiCo were found just one time and many riboswitches, such as THF,  
129 guanidine (I, II and III) and fluoride riboswitches, were not observed with any genes associated with  
130 virulence. Among the cation associated ncRNAs, the most common RNA family is associated to a zinc  
131 metalloproteinase, *Listeria snRNA rli51*, followed by the Mg<sup>2+</sup> riboswitch and *ykoK*. Thermoregulators  
132 are clearly important ncRNAs regarding pathogenesis as 14 families of such ncRNAs are found upstream  
133 of ~9,000 instances of VFs (or VF homologs). The most abundant thermoregulator identified is HtrA 5'  
134 UTR, followed by *cspA* followed by TrxA-5'UTR and shuA/chuA 5' UTR. While this may appear as few,  
135 compared to the 35 RNA *cis*-thermoregulator families, most of the other families have relatively few  
136 representatives or are found only in taxons never associated with infections, such as *cyanobacteria*.

### 137 **3.2 tRNA upstream of virulence factors**

138 We observed tRNAs upstream of hundreds of genes (Table S6). Interestingly, several VFs have pseudo-  
139 tRNAs in their UTR, such as *clpP* encoding a protease; and numerous genes have tRNA sequences on  
140 the opposite polarity in their 5'-UTR, like the *rnr* encoded ribonuclease for many *Betaproteobacteria*  
141 species (Table S7).

142 In numerous cases, tRNAs are found close enough to the downstream gene to suggest co-transcription  
143 (Tables S6 and S8). We tried to determine whether *Ef-Tu* was co-transcribed with the three tRNAs  
144 observed upstream of its cds in several *Neisseria* strains. The tRNA closest to *Ef-Tu* is at only 46 bases  
145 from its start codon, leaving little room for a promoter. The northern blot result reveals the three tRNAs  
146 (Tyr, Gly, Thr) are co-transcribed (supplementary Figure S1 and S2), but co-transcription with *Ef-Tu* was  
147 not apparent. Nevertheless, other instances of co-transcription are very likely in 56 cases where tRNAs  
148 are less than 40 bases apart from the downstream VF (or VF homolog). In some cases, the tRNAs even  
149 overlap the annotated 5' portion of the coding sequence, such as in several strains of *Helicobacter pylori*  
150 for a gene encoding an outer membrane protein. Given precedents of tRNA<sup>Sec</sup> that overlap the coding

151 sequence of the *selB* gene close to its 3' end (Mukai, 2021), tRNAs overlapping the 5' end to enact gene  
152 control are easy to envision.

### 153 3.3 Transcription Terminators

154 We evaluated existing “Rho-independent transcription terminators” (RiTTs, Table S9) and “Rho-  
155 dependent transcription terminators” (RTTs, Table S10) for VFs as we did for other ncRNAs. However,  
156 because transcription terminators are very common, we only evaluated those upstream of VFs (as  
157 annotated in PATRIC, VFDB or Victors). These results can recapitulate several instances of RiTT deemed  
158 responsible of riboregulation as determined by Term-seq (Dar et al., 2016) (Table S11 and supplementary  
159 information). For example, *rli51* is a cis-regulatory RNA in *L. monocytogenes* that we highlight as  
160 associated to VFs and where we predict a RiTT, which is corroborated by the Term-seq results of Dar et  
161 al. 2016. This illustrates the usefulness of RiboGap to rapidly gather information on intergenic sequences  
162 and infer hypotheses that can be evaluated. As for the tRNA analyses, we considered distance from the  
163 start codon, we found that 189 and 6,403 predicted RiTTs and RTTs, respectively, are at less than 40  
164 bases from the start codon, suggesting some transcription regulation independent from the promoter.

## 165 4 Discussion

166 To our knowledge, the results obtained from RiboGap and virulence databases are the most exhaustive  
167 inventory to date for known VFs related to cis-regulatory RNAs. Several hits are already well known as  
168 ncRNAs that regulate virulence factors (eg. thermoregulator RNA and *prfA* gene (Johansson et al.,  
169 2002)). The importance of thermoregulator RNAs in virulence of *Yersinia* (Nuss et al., 2017) and other  
170 species like *Shigella.sp* and pathogenic *E. coli* (Heroven et al., 2017) has been discussed by others. The  
171 prevalence of thermoregulator RNAs is high, as this is an excellent way for bacteria that can live in soil  
172 or water to determine they have moved to a warm-blooded animal.

173 Similarly, it is known that metals play important roles in virulence (Papp-Wallace and Maguire, 2006,  
174 Broder et al., 2016, Guragain et al., 2016, Imazawa et al., 2016, Palmer and Skaar, 2016, Wedekind et  
175 al., 2017). It is thus also not surprising that the list includes thousands of ncRNAs which appear connected  
176 to metal cations, in one way or another. The role of  $Mg^{2+}$  in virulence was previously connected to a  
177  $Mg^{2+}$  riboswitch (Cromie et al., 2006, Dann et al., 2007) and plays a major role in the pathogenicity of  
178 *Salmonella enterica* serovar Typhimurium (Groisman et al., 2006, Ramesh and Winkler, 2010, Groisman  
179 et al., 2013). The role of virulence for other cations such as nickel (Benoit et al., 2013), cobalt (Kersey  
180 et al., 2012, Remy et al., 2013), calcium (Sarkisova et al., 2005, Guragain et al., 2013, Sarkisova et al.,  
181 2014, Dar et al., 2016, Guragain et al., 2016, Hay et al., 2017), manganese (Boyer et al., 2002, Papp-  
182 Wallace and Maguire, 2006, Shi et al., 2014, Juttukonda and Skaar, 2015) or zinc (Dintilhac et al., 1997,  
183 Corbett et al., 2012, Mastropasqua et al., 2018, Velasco et al., 2018) has been demonstrated as well. We  
184 have not found the manganese riboswitch (*yybP-ykoY*) (Barrick et al., 2004, Dambach et al., 2015, Price  
185 et al., 2015), in spite of several known links between  $Mn^{2+}$  and virulence. Conversely, in addition to the  
186 single Ni-Co riboswitches (Furukawa et al., 2015) from the list (Hall and Lee, 2018) we have found some  
187 genes involved with nickel and/or cobalt transport associated to the cobalamin and TPP riboswitches  
188 (Table S2 and S3). Likewise, even if is not the function with which we have found it associated to a VF,  
189 ZTP-sensing has been previously associated to Zn homeostasis (Nies, 2019). Moreover, there is one hit

190 for an Mg<sup>2+</sup> ATPase C transporter found in association with the CspA thermoregulator (Table S2 and S4).  
191 These examples are indicative that genes are not always regulated by the most obvious signals, further  
192 emphasizing the importance of this compendium of VF-associated ncRNAs to provide more insight in  
193 the cues used by pathogens to regulate their virulence.

194 Second messengers are often involved in regulation of virulence of bacteria (Hall and Lee, 2018) and  
195 several second messengers have been shown to be sensed by riboswitches in the last decade including :  
196 cyclic-di-GMP (Sudarsan et al., 2008), cyclic-di-AMP (Nelson et al., 2013), cyclic-GAMP (Nelson et  
197 al., 2015) and ppGpp (Sherlock et al., 2018). The cyclic-di-GMP (I and II) riboswitches are known to  
198 regulate several VFs (Tamayo, 2019), but only cyclic-di-GMP-I was found in our searches. This is likely  
199 due to the relative stringency (60% identity on 98% of sequence length) when we looked for homology.  
200 Indeed, reducing our threshold to 40% identity revealed many instances of cyclic-di-GMP-II  
201 riboswitches upstream of genes encoding components of a type II secretion system, which has homologs  
202 annotated as VFs. Moreover, many other genes not recognized as VFs in PATRIC (and thus absent from  
203 our list) are also regulated by cyclic-di-GMP riboswitches, such as: *gbpA*, a characterized colonization  
204 factor from *Vibrio cholerae* (Sudarsan et al., 2008, Kariisa et al., 2016); the collagen adhesion protein  
205 from the well-known insect-killing bacteria, *Bacillus thuringiensis* (Tang et al., 2016); or several putative  
206 virulence genes from *Clostridiodes difficile* (Abt et al., 2016). Also, cyclic-di-GMP is known to influence  
207 bacterial behaviour with regards to motility or formation of biofilm, which can impact virulence (Ha and  
208 O'Toole, 2015, Valentini and Filloux, 2016), but many of the genes involved in these processes are not  
209 necessarily VFs because they are also important for the bacteria in other contexts. Thus, while we tried  
210 to be as thorough as possible, clearly the list of thousands of instances of VFs and orthologs putatively  
211 regulated by ncRNAs should not be considered as absolutely exhaustive. Other possibilities not yet  
212 annotated may also exist, e.g. while no guanidine riboswitches have been found in our search, we could  
213 presume that for bacteria which cause infection in the urinary track, guanidine riboswitches would be a  
214 good way of determining they have reached this site, and thus express relevant VFs, since guanidine is  
215 present at much higher concentration in urine (Wishart et al., 2007, Wishart et al., 2009, Durantou et al.,  
216 2012, Wishart et al., 2013, Wishart et al., 2018). Several RNA motifs known to be involved in VF  
217 regulation were not included in the present study because their annotation is deficient. Perhaps the best  
218 example for this is the RNA motif bound by the CsrA/RsmA proteins, which have a major impact on  
219 virulence (Vakulskas et al., 2015). This motif is composed of a stem-loop with a single stranded “GGA”  
220 in the loop and it is usually found in tandem where one of the two loops overlaps the ribosome binding  
221 site (RBS) (Valverde et al., 2004, Lapouge et al., 2008, Curry and Tomich, 1988, Chen et al., 1994).  
222 While our list includes the Two-AYGGAY (RF01731) family, which most likely corresponds to a subset  
223 of the 5'-UTRs targeted by CsrA/RsmA, hundreds of targets are known for these proteins (Kulkarni et  
224 al., 2014) and the binding motif consensus appears relatively relaxed, making it more difficult to annotate  
225 with a high degree of confidence. Other examples of RNA-binding protein affecting VFs exist, such as  
226 the TRAP complex which binds ~10 repeats of (U/G)AG within one UTR (Gollnick et al., 2005),  
227 regulating genes such as *trpE* (encoding an anthranilate synthase, already shown to be regulated by TRAP  
228 (Gollnick et al., 2005), and potentially *cna3* (encoding a collagen adhesin) in *Streptococcus gallolyticus*,  
229 but which we only predicted by pattern matching (Naghdi et al., 2017) and was not confirmed  
230 experimentally as a TRAP target. We thus avoided this type of motifs for our compilation to avoid  
231 spurious annotations as much as possible.

232 One of the ncRNAs that was searched independently was tRNA. Many VFs on the list exhibit presence  
233 of tRNAs very close to their coding sequence (less than 30 nt). While we could not show by Northern  
234 blot that *Ef-Tu* is indeed co-transcribed with these tRNAs, they are still likely to be, given the short  
235 distance of only 46 bases separating them from the AUG. The rate of processing of the tRNAs might be  
236 too fast to permit detection of a transcript including the tRNAs together with *Ef-Tu*. In fact, co-  
237 transcription was previously observed in *E. coli* (Miyajima et al., 1981) and the proximity of tRNAs to  
238 *Ef-Tu* was already noticed in several species (Cousineau et al., 1992), which we find is generalized to  
239 numerous bacteria (Table S6), *Proteobacteria*, *Bacteroidetes* as well as *Firmicutes*. Presumed co-  
240 transcription of *Ef-Tu* with these tRNAs could suggest potential regulation by tRNA or merely co-  
241 regulation due to the use of the same promoter. This is further supported by the absence of predicted  
242 promoters between the tRNA closest to *Ef-Tu* and the start codon, as well as by the presence of a few  
243 promoters upstream of the three tRNA sequences, promoters which would thus also be responsible of *Ef-*  
244 *Tu* expression. Several roles beyond the transfer of amino acids have been demonstrated for tRNAs or  
245 fragments of tRNAs (Ryckelynck et al., 2005, Raina and Ibba, 2014, Fricker et al., 2019). The tRNA  
246 sequences found on the opposite strand, if co-transcribed with the gene downstream, could potentially  
247 be targeted by tRNAs (or tRNA fragments) in a way analogous to many sRNAs. Also, some of the  
248 machinery involved in tRNA processing and modification is known to act on mRNAs and affect their  
249 expression, like the NSun2 tRNA methylase (Zhang et al., 2012) which may imply that tRNA sequences  
250 (and pseudo-tRNAs) found in UTRs could act as substrates for such modification and processing.  
251 Furthermore, several viruses use tRNA-like motifs, either for their replication or to initiate translation in  
252 eucaryotes (Skuzeski et al., 1996, Hacker and Kaper, 2000, Zeenko et al., 2002). Finally, many  
253 bacteriophages use tRNA sequences to integrate in bacterial chromosomes, making it likely to find  
254 tRNAs in proximity to pathogenicity islands and related mobile elements (Hacker and Kaper, 2000) and  
255 implying that these tRNAs may have a critical role in horizontal gene transfer and the evolution of  
256 virulence. Yet, the role of tRNAs upstream of VFs, if any, remains to be elucidated in most cases.

257 Bacteria respond to signals coming from the host and its immune system. Such signal can be simple and  
258 yet present an acute change in the bacterial environment, like the change in temperature when entering a  
259 host, to which bacteria need to respond very quickly. Regulation by ncRNAs is very fast and less  
260 energetically demanding compared to regulation by protein. Discovering more ncRNAs involved in VF  
261 regulation helps better understand the means of bacteria to escape the host immune system, as well as  
262 provide potential targets to overcome bacteria pathogenicity as a promising way for treatment

## 263 **5 Conflict of Interest**

264 The authors declare that the research was conducted in the absence of any commercial or financial  
265 relationships that could be construed as a potential conflict of interest.

## 266 **6 Author Contributions**

267 Bioinformatics and data analysis was performed by MRN, KS (tRNA section) and SD. Experiments  
268 were performed by MRN. Manuscript was written by MRN and JP with help from KS and SD.

## 269 **7 Funding**

270 Natural Sciences and Engineering Council of Canada (NSERC) [418240 to J.P.]. J.P. is a junior FRQS  
271 scholar. KS received fellowships from the Fondation Armand-Frappier and NSERC.

## 272 **8 Acknowledgements**

273 We acknowledge Dr. Frédéric Veyrier (INRS-AFSB) for the kind gift of *Neisseria* RNA extracts and  
274 Emilie Boutet for her help with the Northern blot technique.

## 275 **9 References**

- 276  
277 Abduljalil, J. (2018). Bacterial riboswitches and RNA thermometers: Nature and contributions to  
278 pathogenesis. *Noncoding RNA Res.* 3, 54-63.  
279 Abt, M., McKenney, P. and Pamer, E. (2016). Clostridium difficile colitis: pathogenesis and host defence.  
280 *Nat. Rev. Microbiol.* 14, 609-620.  
281 Altschul, S., Gish, W., Miller, W., Myers, E. and Lipman, D. (1990). Basic local alignment search tool.  
282 *J. Mol. Biol.* 215, 403-410.  
283 Barrick, J., Corbino, K., Winkler, W., Nahvi, A., Mandal, M., Collins, J. et al. (2004). New RNA motifs  
284 suggest an expanded scope for riboswitches in bacterial genetic control. *Proc. Natl. Acad. Sci. U.S.A.*  
285 101, 6421-6426.  
286 Bäumlér, A. and Sperandio, V. (2016). Interactions between the microbiota and pathogenic bacteria in  
287 the gut. *Nature* 535, 85-93. doi: 10.1038/nature18849.  
288 Benoit, S., Miller, E. and Maier, R. (2013). Helicobacter pylori stores nickel to aid its host colonization.  
289 *Infect. Immun.* 81, 580-584.  
290 Boyer, E., Bergevin, I., Malo, D., Gros, P. and Cellier, M. (2002). Acquisition of Mn(II) in addition to  
291 Fe(II) is required for full virulence of Salmonella enterica serovar Typhimurium. *Infect. Immun.* 70, 6032-  
292 6042.  
293 Broder, U., Jaeger, T. and Jenal, U. (2016). LadS is a calcium-responsive kinase that induces acute-to-  
294 chronic virulence switch in Pseudomonas aeruginosa. *Nat Microbiol.* 2, 16184.  
295 Brown, S., Cornforth, D. and Mideo, N. (2012). Evolution of virulence in opportunistic pathogens:  
296 generalism, plasticity, and control.. *Trends Microbiol.* 20, 336-342. doi: 10.1016/j.tim.2012.04.005.  
297 Caldelari, I., Chao, Y., Romby, P. and Vogel, J. (2013). RNA-mediated regulation in pathogenic bacteria..  
298 *Cold Spring Harb Perspect Med* 3, a010298. doi: 10.1101/cshperspect.a010298.  
299 Camacho, C., Coulouris, G., Avagyan, V., Ma, N., Papadopoulos, J., Bealer, K. et al. (2009). BLAST+:  
300 architecture and applications. *BMC Bioinformatics* 10, 421.  
301 Casadevall, A. and Pirofski, L. (2003). The damage-response framework of microbial pathogenesis.. *Nat*  
302 *Rev Microbiol.* 1, 17-24. doi: 10.1038/nrmicro732.



- 303 Chakravarty, S. and Massé, E. (2019). RNA-Dependent Regulation of Virulence in Pathogenic Bacteria.  
304 *Front Cell Infect Microbiol.* 9, 337.
- 305 Chan, P. and Lowe, T. (2019). tRNAscan-SE: Searching for tRNA Genes in Genomic Sequences.  
306 *Methods Mol. Biol.* 1962, 1-14.
- 307 Chen, H., Bjerknes, M., Kumar, R. and Jay, E. (1994). Determination of the optimal aligned spacing  
308 between the Shine-Dalgarno sequence and the translation initiation codon of Escherichia coli mRNAs.  
309 *Nucleic Acids Res.* 22, 4953-4957.
- 310 Chen, L., Zheng, D., Liu, B., Yang, J. and Jin, Q. (2016). VFDB 2016: hierarchical and refined dataset  
311 for big data analysis--10 years on.. *Nucleic Acids Res.* 44, D694-D697. doi: 10.1093/nar/gkv1239.
- 312 Clarke, M., Hughes, D., Zhu, C., Boedeker, E. and Sperandio, V. (2006). The QseC sensor kinase: a  
313 bacterial adrenergic receptor. *Proc. Natl. Acad. Sci. U.S.A.* 103, 10420-10425.
- 314 Corbett, D., Wang, J., Schuler, S., Lopez-Castejon, G., Glenn, S., Brough, D. et al. (2012). Two zinc  
315 uptake systems contribute to the full virulence of *Listeria monocytogenes* during growth in vitro and in  
316 vivo. *Infect. Immun.* 80, 14-21.
- 317 Cousineau, B., Cerpa, C., Lefebvre, J. and Cedergren, R. (1992). The sequence of the gene encoding  
318 elongation factor Tu from *Chlamydia trachomatis* compared with those of other organisms. *Gene* 120,  
319 33-41.
- 320 Cromie, M., Shi, Y., Latifi, T. and Groisman, E. (2006). An RNA sensor for intracellular Mg(2+). *Cell*  
321 125, 71-84.
- 322 Curry, K. and Tomich, C. (1988). Effect of ribosome binding site on gene expression in *Escherichia coli*.  
323 *DNA* 7, 173-179.
- 324 Dambach, M., Sandoval, M., Updegrove, T., Anantharaman, V., Aravind, L., Waters, L. et al. (2015). The  
325 ubiquitous yybP-ykoY riboswitch is a manganese-responsive regulatory element. *Mol. Cell* 57, 1099-  
326 1109.
- 327 Dann, C., Wakeman, C., Sieling, C., Baker, S., Irnov, I. and Winkler, W. (2007). Structure and mechanism  
328 of a metal-sensing regulatory RNA. *Cell* 130, 878-892.
- 329 Dar, D., Shamir, M., Mellin, J., Koutero, M., Stern-Ginossar, N., Cossart, P. et al. (2016). Term-seq  
330 reveals abundant ribo-regulation of antibiotics resistance in bacteria. *Science* 352, aad9822.
- 331 Dintilhac, A., Alloing, G., Granadel, C. and Claverys, J. (1997). Competence and virulence of  
332 *Streptococcus pneumoniae*: Adc and PsaA mutants exhibit a requirement for Zn and Mn resulting from  
333 inactivation of putative ABC metal permeases. *Mol. Microbiol.* 25, 727-739.
- 334 DiRita, V., Engleberg, N., Heath, A., Miller, A., Crawford, J. and Yu, R. (2000). Virulence gene regulation  
335 inside and outside. *Philos Trans R Soc Lond B Biol Sci.* 355, 657-665. doi: 10.1098/rstb.2000.0606.
- 336 Di Salvo, M., Puccio, S., Peano, C., Lacour, S., Alifanoe, P. (2019) RhoTermPredict: an algorithm for  
337 predicting Rho-dependent transcription terminators based on *Escherichia coli*, *Bacillus subtilis* and  
338 *Salmonella enterica* databases. *BMC Bioinformatics* 20, 117.
- 339 Do, H., Makthal, N., VanderWal, A., Saavedra, M., Olsen, R., Musser, J. et al. (2019). Environmental pH  
340 and peptide signaling control virulence of *Streptococcus pyogenes* via a quorum-sensing pathway. *Nat*  
341 *Commun.* 10, 2586.
- 342 Durantón, F., Cohen, G., De Smet, R., Rodríguez, M., Jankowski, J., Vanholder, R. et al. (2012). Normal  
343 and pathologic concentrations of uremic toxins. *J. Am. Soc. Nephrol.* 23, 1258-1270.
- 344 Eddy, S. (2001). Non-coding RNA genes and the modern RNA world.. *Nat Rev Genet.* 2, 919-929. doi:  
345 10.1038/35103511.
- 346 Fricker, R., Brogli, R., Luidalepp, H., Wyss, L., Fasnacht, M., Joss, O. et al. (2019). A tRNA half  
347 modulates translation as stress response in *Trypanosoma brucei*. *Nat Commun.* 10, 118.
- 348 Fris, M. and Murphy, E. (2016). Riboregulators: Fine-Tuning Virulence in *Shigella*. *Front Cell Infect*  
349 *Microbiol.* 6, 2. doi: 10.3389/fcimb.2016.00002.

- 350 Furukawa, K., Ramesh, A., Zhou, Z., Weinberg, Z., Vallery, T., Winkler, W. et al. (2015). Bacterial  
351 riboswitches cooperatively bind Ni(2+) or Co(2+) ions and control expression of heavy metal  
352 transporters. *Mol. Cell* 57, 1088-1098.
- 353 García Véscovi, E., Soncini, F. and Groisman, E. (1996). Mg<sup>2+</sup> as an extracellular signal: environmental  
354 regulation of Salmonella virulence. *Cell* 84, 165-174.
- 355 Gardner, P. P., Barquist, L., Bateman, A., Nawrocki, E. P., Weinberg, Z. (2011) RNIE: genome-wide  
356 prediction of bacterial intrinsic terminators. *Nucleic Acids Res.*39(14): 5845–5852.
- 357 Gollnick, P., Babitzke, P., Antson, A. and Yanofsky, C. (2005). Complexity in regulation of tryptophan  
358 biosynthesis in *Bacillus subtilis*. *Annu. Rev. Genet.* 39, 47-68.
- 359 Gripenland, J., Netterling, S., Loh, E., Tiensuu, T., Toledo-Arana, A. and Johansson, J. (2010). RNAs:  
360 regulators of bacterial virulence. *Nat Rev Microbiol.* 8, 857-866. doi: 10.1038/nrmicro2457.
- 361 Groisman, E., Cromie, M., Shi, Y. and Latifi, T. (2006). A Mg<sup>2+</sup>-responding RNA that controls the  
362 expression of a Mg<sup>2+</sup> transporter. *Cold Spring Harb Symp Quant Biol.* 71, 251-258. doi:  
363 10.1101/sqb.2006.71.005.
- 364 Groisman, E., Hollands, K., Kriner, M., Lee, E., Park, S. and Pontes, M. (2013). Bacterial Mg<sup>2+</sup>  
365 homeostasis, transport, and virulence. *Annu Rev Genet.* 47, 625-646. doi: 10.1146/annurev-genet-  
366 051313-051025.
- 367 Grundy, F. and Henkin, T. (1993). tRNA as a positive regulator of transcription antitermination in *B.*  
368 *subtilis*. *Cell* 74, 475-482.
- 369 Guragain, M., King, M., Williamson, K., Perez-Osorio, A., Akiyama, T., Khanam, S. et al. (2016). The  
370 *Pseudomonas aeruginosa* PAO1 Two-Component Regulator CarSR Regulates Calcium Homeostasis and  
371 Calcium-Induced Virulence Factor Production through Its Regulatory Targets CarO and CarP. *J.*  
372 *Bacteriol.* 198, 951-963.
- 373 Guragain, M., Lenaburg, D., Moore, F., Reutlinger, I. and Patrauchan, M. (2013). Calcium homeostasis  
374 in *Pseudomonas aeruginosa* requires multiple transporters and modulates swarming motility. *Cell*  
375 *Calcium* 54, 350-361.
- 376 Ha, D. and O'Toole, G. (2015). c-di-GMP and its Effects on Biofilm Formation and Dispersion: a  
377 *Pseudomonas Aeruginosa* Review. *Microbiol Spectr* 3, 0003-2014.
- 378 Hacker, J. and Kaper, J. (2000). Pathogenicity islands and the evolution of microbes. *Annu. Rev.*  
379 *Microbiol.* 54, 641-679.
- 380 Hay, A., Yang, M., Xia, X., Liu, Z., Hammons, J., Fenical, W. et al. (2017). Calcium Enhances Bile Salt-  
381 Dependent Virulence Activation in *Vibrio cholerae*. *Infect. Immun.* 85,
- 382 Heroven, A., Nuss, A. and Dersch, P. (2017). RNA-based mechanisms of virulence control in  
383 Enterobacteriaceae. *RNA Biol.* 14, 471-487.
- 384 Hör, J., Gorski, S. and Vogel, J. (2018). Bacterial RNA Biology on a Genome Scale.. *Mol Cell* 70, 785-  
385 799. doi: 10.1016/j.molcel.2017.12.023.
- 386 Hughes, D. and Sperandio, V. (2008). Inter-kingdom signalling: communication between bacteria and  
387 their hosts.. *Nat Rev Microbiol.* 6, 111-120. doi: 10.1038/nrmicro1836.
- 388 Imazawa, R., Takahashi, Y., Aoki, W., Sano, M. and Ito, M. (2016). A novel type bacterial flagellar motor  
389 that can use divalent cations as a coupling ion.. *Sci Rep.* 6, 19773. doi: 10.1038/srep19773.
- 390 Johansson, J., Mandin, P., Renzoni, A., Chiaruttini, C., Springer, M. and Cossart, P. (2002). An RNA  
391 thermosensor controls expression of virulence genes in *Listeria monocytogenes*.. *Cell* 110, 551-561.
- 392 Juttukonda, L. and Skaar, E. (2015). Manganese homeostasis and utilization in pathogenic bacteria. *Mol.*  
393 *Microbiol.* 97, 216-228.
- 394 Kariisa, A., Weeks, K. and Tamayo, R. (2016). The RNA Domain Vc1 Regulates Downstream Gene  
395 Expression in Response to Cyclic Diguanylate in *Vibrio cholerae*. *PLoS ONE* 11, e0148478.
- 396 Kersey, C., Agyemang, P. and Dumenyo, C. (2012). CorA, the magnesium/nickel/cobalt transporter,  
397 affects virulence and extracellular enzyme production in the soft rot pathogen *Pectobacterium*  
398 *carotovorum*. *Mol. Plant Pathol.* 13, 58-71.

- 399 Kulkarni, P., Jia, T., Kuehne, S., Kerkering, T., Morris, E., Searle, M. et al. (2014). A sequence-based  
400 approach for prediction of CsrA/RsmA targets in bacteria with experimental validation in *Pseudomonas*  
401 *aeruginosa*. *Nucleic Acids Res.* 42, 6811-6825.
- 402 Lapouge, K., Schubert, M., Allain, F. and Haas, D. (2008). Gac/Rsm signal transduction pathway of  
403 gamma-proteobacteria: from RNA recognition to regulation of social behaviour. *Mol. Microbiol.* 67, 241-  
404 253.
- 405 Lebreton, A. and Cossart, P. (2017). RNA- and protein-mediated control of *Listeria monocytogenes*  
406 virulence gene expression. *RNA Biol.* 14, 460-470.
- 407 Leimeister-Wächter, M., Haffner, C., Domann, E., Goebel, W. and Chakraborty, T. (1990).  
408 Identification of a gene that positively regulates expression of listeriolysin, the major virulence factor of  
409 *Listeria monocytogenes*. *Proc Natl Acad Sci U S A.* 87, 8336-8340.
- 410 Leonard, S., Meyer, S., Lacour, S., Nasser, W., Hommais, F. and Reverchon, S. (2019). APERO: a  
411 genome-wide approach for identifying bacterial small RNAs from RNA-Seq data. *Nucleic Acids Res.*  
412 Loh, E., Dussurget, O., Gripenland, J., Vaitkevicius, K., Tiensuu, T., Mandin, P. et al. (2009). A trans-  
413 acting riboswitch controls expression of the virulence regulator PrfA in *Listeria monocytogenes*. *Cell*  
414 139, 770-779. doi: 10.1016/j.cell.2009.08.046.
- 415 Mao, C., Abraham, D., Wattam, A., Wilson, M., Shukla, M., Yoo, H. et al. (2015). Curation, integration  
416 and visualization of bacterial virulence factors in PATRIC. *Bioinformatics* 31, 252-258.
- 417 Massé E, Gottesman S. (2002) A small RNA regulates the expression of genes involved in iron  
418 metabolism in *Escherichia coli*. *Proc Natl Acad Sci U S A.* 99, 4620-4625.
- 419 Mastropasqua, M., Lamont, I., Martin, L., Reid, D., D'Orazio, M. and Battistoni, A. (2018). Efficient zinc  
420 uptake is critical for the ability of *Pseudomonas aeruginosa* to express virulence traits and colonize the  
421 human lung. *J Trace Elem Med Biol.* 48, 74-80.
- 422 Mengaud, J., Dramsi, S., Gouin, E., Vazquez-Boland, J., Milon, G. and Cossart, P. (1991). Pleiotropic  
423 control of *Listeria monocytogenes* virulence factors by a gene that is autoregulated. *Mol Microbiol.* 5,  
424 2273-2283.
- 425 Miyajima, A., Shibuya, M., Kuchino, Y. and Kaziro, Y. (1981). Transcription of the *E. coli* *tufB* gene:  
426 Cotranscription with four tRNA genes and inhibition by guanosine-5'-diphosphate-3'-diphosphate.  
427 *Molecular and General Genetics MGG* 183, 13-19. doi: 10.1007/BF00270131.
- 428 Morita, M., Tanaka, Y., Kodama, T., Kyogoku, Y., Yanagi, H. and Yura, T. (1999). Translational induction  
429 of heat shock transcription factor sigma32: evidence for a built-in RNA thermosensor. *Genes Dev* 13,  
430 655-665.
- 431 Mukai, T. (2021) Bioinformatic Prediction of an tRNA<sup>Sec</sup> Gene Nested inside an Elongation Factor  
432 SelB Gene in Alphaproteobacteria. *Int. J. Mol. Sci.* 22, 4605
- 433 Mulhbach, J., Brouillette, E., Allard, M., Fortier, L., Malouin, F. and Lafontaine, D. (2010). Novel  
434 riboswitch ligand analogs as selective inhibitors of guanine-related metabolic pathways. *PLoS Pathog.*  
435 6, e1000865.
- 436 Naghdi, M., Smail, K., Wang, J., Wade, F., Breaker, R. and Perreault, J. (2017). Search for 5'-leader  
437 regulatory RNA structures based on gene annotation aided by the RiboGap database. *Methods* 117, 3-13.  
438 doi: 10.1016/j.ymeth.2017.02.009.
- 439 Nahvi, A., Sudarsan, N., Ebert, M., Zou, X., Brown, K. and Breaker, R. (2002). Genetic control by a  
440 metabolite binding mRNA. *Chem Biol* 9, 1043.
- 441 Nelson, J., Sudarsan, N., Furukawa, K., Weinberg, Z., Wang, J. and Breaker, R. (2013). Riboswitches in  
442 eubacteria sense the second messenger c-di-AMP. *Nat. Chem. Biol.* 9, 834-839.
- 443 Nelson, J., Sudarsan, N., Phillips, G., Stav, S., Lunse, C., McCown, P. et al. (2015). Control of bacterial  
444 exoelectrogenesis by c-AMP-GMP. *Proc. Natl. Acad. Sci. U.S.A.* 112, 5389-5394.
- 445 Nies, D. (2019). The ancient alarmone ZTP and zinc homeostasis in *Bacillus subtilis*. *Mol. Microbiol.*  
446 Nuss, A., Heroven, A. and Dersch, P. (2017). RNA Regulators: Formidable Modulators of *Yersinia*  
447 Virulence. *Trends Microbiol.* 25, 19-34.

- 448 Pacheco, A., Curtis, M., Ritchie, J., Munera, D., Waldor, M., Moreira, C. et al. (2012). Fucose sensing  
449 regulates bacterial intestinal colonization. *Nature* 492, 113-117. doi: 10.1038/nature11623.
- 450 Palmer, L. and Skaar, E. (2016). Transition Metals and Virulence in Bacteria. *Annu Rev Genet.* 50, 67-  
451 91. doi: 10.1146/annurev-genet-120215-035146.
- 452 Papp-Wallace, K. and Maguire, M. (2006). Manganese transport and the role of manganese in virulence.  
453 *Annu. Rev. Microbiol.* 60, 187-209.
- 454 Perreault, J., Weinberg, Z., Roth, A., Popescu, O., Chartrand, P., Ferbeyre, G. et al. (2011). Identification  
455 of hammerhead ribozymes in all domains of life reveals novel structural variations. *PLoS Comput. Biol.*  
456 7, e1002031.
- 457 Price, I., Gaballa, A., Ding, F., Helmann, J. and Ke, A. (2015). Mn(2+)-sensing mechanisms of yybP-  
458 ykoY orphan riboswitches. *Mol. Cell* 57, 1110-1123.
- 459 Raina, M. and Ibba, M. (2014). tRNAs as regulators of biological processes. *Front Genet.* 5, 171.
- 460 Ramesh, A. and Winkler, W. (2010). Magnesium-sensing riboswitches in bacteria. *RNA Biol.* 7, 77-83.
- 461 Rasko, D., Moreira, C., Li, D., Reading, N., Ritchie, J., Waldor, M. et al. (2008). Targeting QseC signaling  
462 and virulence for antibiotic development. *Science* 321, 1078-1080. doi: 10.1126/science.1160354.
- 463 Remy, L., Carriere, M., Derre-Bobillot, A., Martini, C., Sanguinetti, M. and Borezee-Durant, E. (2013).  
464 The *Staphylococcus aureus* Opp1 ABC transporter imports nickel and cobalt in zinc-depleted conditions  
465 and contributes to virulence. *Mol. Microbiol.* 87, 730-743.
- 466 Ryckelynck, M., Giege, R. and Frugier, M. (2005). tRNAs and tRNA mimics as cornerstones of  
467 aminoacyl-tRNA synthetase regulations. *Biochimie* 87, 835-845.
- 468 Sarkisova, S., Lotlikar, S., Guragain, M., Kubat, R., Cloud, J., Franklin, M. et al. (2014). A *Pseudomonas*  
469 *aeruginosa* EF-hand protein, EfhP (PA4107), modulates stress responses and virulence at high calcium  
470 concentration. *PLoS ONE* 9, e98985.
- 471 Sarkisova, S., Patrauchan, M., Berglund, D., Nivens, D. and Franklin, M. (2005). Calcium-induced  
472 virulence factors associated with the extracellular matrix of mucoid *Pseudomonas aeruginosa* biofilms.  
473 *J. Bacteriol.* 187, 4327-4337.
- 474 Sayers, S., Li, L., Ong, E., Deng, S., Fu, G., Lin, Y. et al. (2019). Victors: a web-based knowledge base  
475 of virulence factors in human and animal pathogens. *Nucleic Acids Res.* 47, D693-D700.
- 476 Sharma, A., Dhasmana, N., Dubey, N., Kumar, N., Gangwal, A., Gupta, M. et al. (2017). Bacterial  
477 Virulence Factors: Secreted for Survival. *Indian J. Microbiol.* 57, 1-10.
- 478 Sherlock, M., Sudarsan, N. and Breaker, R. (2018). Riboswitches for the alarmone ppGpp expand the  
479 collection of RNA-based signaling systems. *Proc. Natl. Acad. Sci. U.S.A.* 115, 6052-6057.
- 480 Shi, Y., Zhao, G. and Kong, W. (2014). Genetic analysis of riboswitch-mediated transcriptional regulation  
481 responding to Mn<sup>2+</sup> in *Salmonella*. *J. Biol. Chem.* 289, 11353-11366.
- 482 Skuzeski, J., Bozarth, C. and Dreher, T. (1996). The turnip yellow mosaic virus tRNA-like structure  
483 cannot be replaced by generic tRNA-like elements or by heterologous 3' untranslated regions known to  
484 enhance mRNA expression and stability. *J. Virol.* 70, 2107-2115.
- 485 Stav, S., Atilho, R., Mirihana Arachchilage, G., Nguyen, G., Higgs, G. and Breaker, R. (2019). Genome-  
486 wide discovery of structured noncoding RNAs in bacteria. *BMC Microbiol.* 19, 66.
- 487 Sudarsan, N., Lee, E., Weinberg, Z., Moy, R., Kim, J., Link, K. et al. (2008). Riboswitches in eubacteria  
488 sense the second messenger cyclic di-GMP. *Science* 321, 411-413.
- 489 Tamayo, R. (2019). Cyclic diguanylate riboswitches control bacterial pathogenesis mechanisms. *PLoS*  
490 *Pathog.* 15, e1007529.
- 491 Tang, Q., Yin, K., Qian, H., Zhao, Y., Wang, W., Chou, S. et al. (2016). Cyclic di-GMP contributes to  
492 adaption and virulence of *Bacillus thuringiensis* through a riboswitch-regulated collagen adhesion  
493 protein. *Sci Rep.* 6, 28807.
- 494 Vakulskas, C., Potts, A., Babitzke, P., Ahmer, B. and Romeo, T. (2015). Regulation of bacterial virulence  
495 by Csr (Rsm) systems. *Microbiol. Mol. Biol. Rev.* 79, 193-224.

496 Valentini, M. and Filloux, A. (2016). Biofilms and Cyclic di-GMP (c-di-GMP) Signaling: Lessons from  
497 *Pseudomonas aeruginosa* and Other Bacteria. *J. Biol. Chem.* 291, 12547-12555.

498 Valverde, C., Lindell, M., Wagner, E. and Haas, D. (2004). A repeated GGA motif is critical for the  
499 activity and stability of the riboregulator RsmY of *Pseudomonas fluorescens*. *J. Biol. Chem.* 279, 25066-  
500 25074.

501 Velasco, E., Wang, S., Sanet, M., Fernandez-Vazquez, J., Jove, D., Glaria, E. et al. (2018). A new role for  
502 Zinc limitation in bacterial pathogenicity: modulation of  $\hat{I}\pm$ -hemolysin from uropathogenic *Escherichia*  
503 *coli*. *Sci Rep.* 8, 6535.

504 Véscovi, E., Ayala, Y., Di Cera, E. and Groisman, E. (1997). Characterization of the bacterial sensor  
505 protein PhoQ. Evidence for distinct binding sites for Mg<sup>2+</sup> and Ca<sup>2+</sup>. *J Biol Chem.* 272, 1440-1443.

506 Wattam, A., Abraham, D., Dalay, O., Disz, T., Driscoll, T., Gabbard, J. et al. (2014). PATRIC, the bacterial  
507 bioinformatics database and analysis resource. *Nucleic Acids Res.* 42, D581-D591. doi:  
508 10.1093/nar/gkt1099.

509 Wedekind, J., Dutta, D., Belashov, I. and Jenkins, J. (2017). Metalloriboswitches: RNA-based inorganic  
510 ion sensors that regulate genes. *J. Biol. Chem.* 292, 9441-9450.

511 Weinberg, Z., Lunse, C., Corbino, K., Ames, T., Nelson, J., Roth, A. et al. (2017). Detection of 224  
512 candidate structured RNAs by comparative analysis of specific subsets of intergenic regions. *Nucleic*  
513 *Acids Res.* 45, 10811-10823.

514 Weinberg, Z., Wang, J., Bogue, J., Yang, J., Corbino, K., Moy, R. et al. (2010). Comparative genomics  
515 reveals 104 candidate structured RNAs from bacteria, archaea, and their metagenomes. *Genome Biol.* 11,  
516 R31.

517 Wishart, D., Feunang, Y., Marcu, A., Guo, A., Liang, K., Vazquez-Fresno, R. et al. (2018). HMDB 4.0:  
518 the human metabolome database for 2018. *Nucleic Acids Res.* 46, D608-D617.

519 Wishart, D., Jewison, T., Guo, A., Wilson, M., Knox, C., Liu, Y. et al. (2013). HMDB 3.0--The Human  
520 Metabolome Database in 2013. *Nucleic Acids Res.* 41, D801-807.

521 Wishart, D., Knox, C., Guo, A., Eisner, R., Young, N., Gautam, B. et al. (2009). HMDB: a knowledgebase  
522 for the human metabolome. *Nucleic Acids Res.* 37, D603-610.

523 Wishart, D., Tzur, D., Knox, C., Eisner, R., Guo, A., Young, N. et al. (2007). HMDB: the Human  
524 Metabolome Database. *Nucleic Acids Res.* 35, D521-526.

525 Zeenko, V., Ryabova, L., Spirin, A., Rothnie, H., Hess, D., Browning, K. et al. (2002). Eukaryotic  
526 elongation factor 1A interacts with the upstream pseudoknot domain in the 3' untranslated region of  
527 tobacco mosaic virus RNA. *J. Virol.* 76, 5678-5691.

528 Zhang, X., Liu, Z., Yi, J., Tang, H., Xing, J., Yu, M. et al. (2012). The tRNA methyltransferase NSun2  
529 stabilizes p16INK<sup>4</sup> mRNA by methylating the 3'-untranslated region of p16. *Nat Commun.* 3, 712.

530

531

Table 1. Compilation of thermoregulators and riboswitches regulating VFs and homologs

| RNA                     | Hits | Genes | Most abundant virulence gene                                               | Signal               | VF hits |
|-------------------------|------|-------|----------------------------------------------------------------------------|----------------------|---------|
| <b>Riboswitches</b>     |      |       |                                                                            | <b>(metabolites)</b> |         |
| ydaO/yuaA leader        | 159  | 2     | resuscitation-promoting factor RpfA                                        | Cyclic di-AMP        | 1       |
| Cyclic di-GMP-I         | 6    | 1     | peptide chain release factor 3                                             | Cyclic di-GMP        | 0       |
| FMN                     | 1    | 1     | catalase                                                                   | FMN                  | 0       |
| TPP                     | 249  | 3     | Phosphomethyl pyrimidine kinase                                            | TPP                  | 2       |
| ZMP/ZTP                 | 133  | 4     | Bifunctional phosphoribosyl amino imidazole carboxamide formyl transferase | ZMP/ZTP              | 0       |
| Lysine                  | 182  | 5     | Aspartokinase                                                              | Lysine               | 0       |
| Glycine                 | 76   | 3     | glycine dehydrogenase                                                      | Glycine              | 0       |
| Purine                  | 777  | 3     | glutamine-hydrolyzing GMP synthase                                         | Purine               | 0       |
| SAM (S box)             | 521  | 3     | ABC transporter substrate-binding protein                                  | SAM                  | 1       |
| SAH                     | 2    | 1     | methionine synthase                                                        | SAH                  | 0       |
| Cobalamin               | 154  | 3     | Glutaredoxin-like protein NrdH                                             | Cobalamin            | 1       |
| Fluoride                | 3    | 1     | Type I glutamate ammonia ligase                                            |                      | 0       |
| Moco                    | 52   | 1     | Formate-tetrahydrofolate                                                   | molybdenum cofactor  | 0       |
|                         |      |       |                                                                            | <b>(cations)</b>     |         |
| ykoK leader             | 10   | 1     | PPE family protein                                                         | magnesium            | 0       |
| Salmonella MgtC leader  | 3443 | 6     | Mg <sup>2+</sup> transporter MgtC                                          | magnesium            | 2       |
| NiCo                    | 1    | 1     | ATP-dependent Clp protease ATP-binding subunit                             | nickel/cobalt        | 1       |
| Listeria snRNA rli51    | 1068 | 3     | zinc metalloproteinase PrtA                                                | (zinc)               | 2       |
| <b>Thermoregulators</b> |      |       |                                                                            | <b>(temperature)</b> |         |
| cspA                    | 2624 | 5     | cold-shock protein                                                         | Temperature          | 2       |
| PrfA UTR                | 238  | 1     | listeriolysin transcriptional regulator PrfA                               | Temperature          | 0       |
| ToxT 5' UTR             | 2    | 1     | pilus/toxin transcriptional regulator ToxT                                 | Temperature          | 0       |
| CnfY 5' UTR             | 6    | 1     | DUF4765 domain-containing protein                                          | Temperature          | 0       |
| RhlA 5' UTR ROSE like   | 96   | 1     | rhamnosyltransferase 1 subunit A                                           | Temperature          | 0       |
| KatA 5' UTR             | 39   | 1     | Catalase                                                                   | Temperature          | 0       |
| SodB 5' UTR             | 360  | 2     | superoxide dismutase [Fe]                                                  | Temperature          | 4       |
| SodC 5' UTR             | 16   | 1     | superoxide dismutase                                                       | Temperature          | 0       |
| LasI 5' UTR ROSE like   | 26   | 1     | acyl-homoserine-lactone synthase                                           | Temperature          | 0       |
| shuA/chuA 5' UTR        | 640  | 1     | TonB-dependent hemoglobin/transferrin/lactoferrin family receptor          | Temperature          | 2       |
| HtrA 5' UTR             | 2847 | 4     | periplasmic serine endoprotease DegP                                       | Temperature          | 2       |
| TrxA 5' UTR             | 1500 | 3     | thioredoxin TrxA                                                           | Temperature          | 2       |
| LcrF                    | 144  | 3     | virulence regulon transcriptional activator                                | Temperature          | 2       |
| AilA 5' UTR             | 126  | 3     | attachment protein                                                         | Temperature          | 0       |

RNA : name of RNA family (as in Rfam)

Hits: total number of times this RNA was found upstream of genes annotated as VFs or homologous to VFs.

Genes: Number of different genes (or protein encoded by those genes) annotated as VFs or homologous to VFs.

Most abundant virulence gene: Example of the corresponding gene (or protein encoded by those genes) that most frequently has this RNA upstream of it.

Signal: Signal detected by the RNA and that triggers the change in expression. For riboswitches (including for cations) the signal is a molecule; for thermoregulators, body temperature of homeotherm (warm-blooded) animals typically triggers virulence; (zinc) the *Listeria* snRNA rli51 is not a known riboswitch, but given the downstream gene, a possible connection with zinc is possible (as seen for the small RNA RhyB and iron for instance (Massé and Gottesman, 2002).

VF hits: hits corresponding only to genes annotated as VFs (and not homologs).

## Supplementary material for:

# A survey of *cis* regulatory non-coding RNA involved in bacterial virulence

Mohammad Reza Naghdi<sup>1</sup>, Samia Djerroud<sup>1</sup>, Katia Smail<sup>1</sup> and Jonathan Perreault<sup>1,\*</sup>

<sup>1</sup>INRS - Centre Armand-Frappier Santé Biotechnologie, 531 boul des Prairies, Laval (Québec), H7V 1B7, Canada.

\* **Correspondence:**

Jonathan Perreault

[jonathan.perreault@inrs.ca](mailto:jonathan.perreault@inrs.ca)

## Table of contents

1. Pipeline to noncoding RNA:2

1.1 RiboGap Query :3

1.2 Blast instructions:4

1.3 Scripts5

#aminoacide\_extractor.pl5

#runblast\_for\_virulence\_file.pl7

# duplication\_out.pl10

Evaluating co-transcription of tRNAs with Ef-Tu19

Sequences of Neisseria species evaluated19

Table S1 : The primer sequences used for Northern blot20

Figure S120

Figure S221

tRNAs upstream of VFs (and homologs)22

Additional methodology details22

Table S7: Virulence genes with pseudo-tRNA predicted in their 5'UTR22

Table S8: Overall tRNAscan results23

Figure S3. Distribution and orientation of tRNA (and pseudo tRNA) sequences upstream of genes.23

Transcription terminators24

Table S11 : The genes which have rho independent terminator24

## **1. Pipeline to noncoding RNA:**

1. Ribogap Query

2 Download file in CSV format/

2.Use aminoacide\_extractor.pl to make Fasta format.

3. Make a blast database by indexing as explained below.

4. run Blast program “runblast\_for\_virulance\_file.pl”

5. take the duplicate hits out by using “duplication\_out.pl”.

6. Use “matrix\_producer\_from\_excel\_file.pl” to make a table with reduced result in csv format.



## 1.1 RiboGap Query :

This query should be used to find all the intergenic sequences which having non coding RNA including ribosomal RNA.

```
select distinct
cds.gene,cds.locus_tag,cds.product,cds.translation,cds.start as
start_of_cds,cds.end as end_of_cds,cds.strand as
strand_of_cds,fragment.fragment,fragment.description as
description_of_fragment,gap5.start as start_of_gap5,gap5.end as
end_of_gap5,gap5.strand as
strand_of_gap5,gap5.sequence,gap5.size,rna_family.fam_id,rna_family.f
am_name,rna_family.description as
description_of_rna_family,rna_family.type,rna_known.start as
start_of_rna_known,rna_known.end as end_of_rna_known,rna_known.strand
as strand_of_rna_known from fragment inner join cds on
fragment.fragment = cds.fragment inner join gap5 on cds.num_cle =
gap5.num_cle inner join rna_gap5 on gap5.num_cle = rna_gap5.num_cle
inner join rna_known on rna_gap5.rna_id = rna_known.rna_id inner join
rna_family on rna_family.fam_id = rna_known.fam_id
```

## 1.2 Blast instructions:

The sequences obtained from RiboGap (Naghdi et al ) should be used as database. The virulence files in fasta format available from PATRIC (Wattam2014) website.

The database should be indexed by BLAST program. The following code was used to index the all Protein data from RiboGap.

```
instruction for indexing blast database
```

```
makeblastdb -in input_db -dbtype nucl -parse_seqids
```

```
-dbtype prot
```

```
-dbtype nucl
```

```
makeblastdb -in input_db -dbtype prot -parse_seqids
```

## 1.3 Scripts

### #aminoacide\_extractor.pl

```
#!/usr/bin/perl

use strict;
use warnings;

##### This program extract the file downloaded from RiboGap
to take out all the AminoAcide sequences for blast
#####
#####3
use autodieqw(:all);
use DBI qw(:sql_types);
use List::AllUtilsqw( :all );
use List::Compare;
use IO::All ;
use Data::Table;
use Try::Tiny;
use File::Temp qw/ tempfiletempdir /;
use File::chmod;
use File::Copy;
#####initializing the variables#####
##### connecting to data
base#####3333333
##### open the file and take all the sequence from translation
sequence#####

my @file_pathogenic;
my $translation;
my @database; ##### @ database stands for file downloded from RiboGap
my $proteine;
my $fh_out;
my $fh_error;
my $accession_locus_tag_product;
my $fasta_format;
my $count; ### to count the lines
my $product;
my $strt_cds;
my $end_cds;
my $strt_igr;
my $end_igr;
my $acc_num;
my $acc_desc;
my $locus_tag;
my $rfam_id;
my $rfam_name;
my $rfam_desc;
my $rfam_type;
my $strt_rna;
my $end_rna;
my $rna_strd;
my $gene_std;
my $gene_strd;
my $igr_srted;
my $size_igr ;
```

```
##### the path to your file
location #####3
## IN
my $path_IN=
"/home/ubuntu/Documents/RNA_disease/database_for_balst/data_25_04_2019/all_igr_ncrn
a_ribogap2_25_04_2019.csv";
#### OUT
my $path_OUT=
"/home/ubuntu/Documents/RNA_disease/database_for_balst/data_25_04_2019/translation_
aminoacide_all_igr_locus_tag_ncrna_ribogap2_24_04_2019.fasta";
#### The path to error file
my
$path_error="/home/ubuntu/Documents/RNA_disease/database_for_balst/data_25_04_2019/
null_protein_translation_version_24_04_2019.txt";

#####
open ($fh_out,">",$path_OUT) ;
open ($fh_error,">", $path_error);
@file_pathogenic = io($path_IN)->slurp;
@file_pathogenic=distinct @file_pathogenic; ##### to remove duplicartion
$count=1;
foreach my $line (@file_pathogenic){
chomp $line;
unless ($count==1){ ##### to omit the first line which has some text
$line =~ s/\S+/\t/;
@database=split /\t+/, $line;

##### take the information of
accession_description_locustag_product_rfam_ID_RNA_description_RNA_strand

$acc_num= $database[8];
$acc_desc =$database[9];
$locus_tag=$database[2];
$product=$database[3];

##### CDS #####

$strt_cds=$database[5];
$end_cds=$database[6];
$gene_strd=$database[7];

##### IGR #####3

$strt_igr =$database[10];
$end_igr=$database[11];
$igr_srted= $database[12];
$size_igr =$database[14];

##### RFAM_RNA #####

$rfam_id =$database[15];
$rfam_name=$database[16];
$rfam_desc=$database[17];
$rfam_type=$database[18];
$strt_rna=$database[19];
$end_rna= $database[20];
$rna_strd= $database[21];

#####
```

```
$accession_locus_tag_product=$acc_num."|_|".$sacc_desc."|_|".$locus_tag."|_|".$product."|_|".$strt_cds."|_|".$end_cds."|_|". $gene_strd."|_|". $strt_igr."|_|".$end_igr."|_|". $igr_srted."|_|". $rfam_id."|_|". $rfam_name."|_|".$rfam_desc."|_|".$rfam_type."|_|". $strt_rna."|_|".$end_rna."|_|". $rna_strd;
```

```
#####
```

```
$translation=$database[4];
```

```
##### check if translation is null and if so produce error file
```

```
unless ($translation eq "null"){
```

```
##### Print out on the monitor
```

```
print ">" , $accession_locus_tag_product, "\n";  
print $translation, "\n";
```

```
##### print into the file #####
```

```
print $fh_out ">" , $accession_locus_tag_product, "\n";
```

```
print $fh_out $translation , "\n",
```

```
##### the error file #####
```

```
}else{  
print $fh_error ">" , $accession_locus_tag_product, "\n";  
print $fh_error $translation, "\n",  
}}
```

```
$count++;
```

```
}
```

```
close $fh_out;
```

```
close $fh_error;
```

```
print "End normal of program ", "\n";
```

## #runblast\_for\_virulance\_file.pl

```
#### PATRIC
```

```
#!/usr/bin/perl
```

```
use warnings;
```

```
use strict;
```

```
use List::AllUtils qw( :all );
```

```
use Try::Tiny;
```

```
use File::Find;
```

```
use autodie qw(open system :socket);
```

```
##### Databases #####33
```

```
my
```

```
$database="/home/ubuntu/Documents/RNA_disease/database_for_blast/data_25_04_2019/Databases_indexed_blast_24_04_2019/proteine_db_ribogap.fasta";
```

```
##### PATRIC #####

my $filename="/home/ubuntu/Documents/RNA_disease/database_for_balst/PATRIC_VF.faa";

#####PATRIC

my $out=
"/home/ubuntu/Documents/RNA_disease/database_for_balst/blast_result_version_24_04_2
019/Blast_98percent_coverage_20190614/PATRIC_result_coverege98_14_06_2019.csv";

#####33
if (-s $filename ) {
try {

## for blastp #####
##### this take 98 percent coverege and not the first hit

system("blastp -query $filename -db $database -evaluate 1 -out $out -outfmt '6
qseqidsseqidpident length mismatch gapopenqstartqendsstart send
qcovsqcovhspevaluebitscoresalltitles ' -qcov_hsp_perc98 -max_target_seqs 500 -
threshold 11 ");

print $filename,"with ", $filename," has finished with blast: \n";
}catch{
    print $_,"\n";
};
}else {
    print "sequences_query.$filename has a problem or is empty\n";
}
print "Normal end of the script \n";
exit;

##### VFDB
#!/usr/bin/perl

use warnings;
use strict;
use List::AllUtilsqw( :all );
use Try::Tiny;
use File::Find;
use autodieqw(open system :socket);

##### Datababes #####33

my
$dbdatabase="/home/ubuntu/Documents/RNA_disease/database_for_balst/data_25_04_2019/Da
tabas_indexe_blast_24_04_2019/proteine_db_ribogap.fasta";

##### VFDB #####

my $filename="/home/ubuntu/Documents/RNA_disease/database_for_balst/VFDB.faa";
my $out=
"/home/ubuntu/Documents/RNA_disease/database_for_balst/blast_coverege_with_descropt
ion/VFDB_coverege_description_coverege_100_07_01_2019.csv";
if (-s $filename ) {
try {
```

```
## for blastp #####
##### this take 98 percent coverege and not the first hit

system("blastp -query $filename -db $database -evaluate 1 -out $out -outfmt '6
qseqidsseqidpident length mismatch gapopenqstartqendsstart send
qcovsqcovhspevaluebitscoresalltitles ' -qcov_hsp_perc98 -max_target_seqs 500 -
threshold 11 ");
print $filename,"with ", $filename," has finished with blast: \n";
}catch{
print $_, "\n";
};
}else {
print "sequences_query.$filename has a problem or is empty\n";

}
print "Normal end of the script \n";
exit;

#### Victors
#!/usr/bin/perl

use warnings;
use strict;
use List::AllUtilsqw( :all );
use Try::Tiny;
use File::Find;
use autodieqw(open system :socket);

##### Datababes #####

my
$dbdatabase="/home/ubuntu/Documents/RNA_disease/database_for_balst/data_25_04_2019/Da
tabas_indexe_blast_24_04_2019/proteine_db_ribogap.fasta";

##### Victors #####

my $filename="/home/ubuntu/Documents/RNA_disease/database_for_balst/Victors.faa";

##### the out files could be change #####3

### Vicrtor database

my $out=
"/home/ubuntu/Documents/RNA_disease/database_for_balst/blast_result_version_24_04_2
019/Blast_98percent_coverage_20190614/Victor_result_coverege_description_coverege98
_14_06_2019.csv";

#####33
if (-s $filename ) {
try {

##### for blastp #####
##### this take 98 percent coverege and not the first hit

system("blastp -query $filename -db $database -evaluate 1 -out $out -outfmt '6
qseqidsseqidpident length mismatch gapopenqstartqendsstart send
qcovsqcovhspevaluebitscoresalltitles ' -qcov_hsp_perc98 -max_target_seqs 500 -
threshold 11 ");
```

```
print $filename,"with ", $filename," has finished with blast: \n";
}catch{
    print $_,"\n";
};
}else {
print "sequences_query.$filename has a problem or is empty\n";
}

print "Normal end of the script \n";
exit;
```

## # duplication\_out.pl

```
#!/usr/bin/perl

use strict;
use warnings;

##### This program take out the duplications

use autodieqw(:all);
use List::AllUtilsqw( :all );
use List::Compare;
use IO::All ;
use File::Slurp;
use Data::Table;
use Try::Tiny;
use File::Temp qw/ tempfiletempdir /;
use File::chmod;
use File::Copy;
use Text::Trim;
use Text::Table::Tiny 0.04 qw/ generate_table /;
use Text::Table::Any;
use Data::Dumper;

#####initializing the variables#####
##### connecting to data base
###open the file and take all the sequence from translation sequence#####

my @file;
my @line;
my $line;
my $fh_out;
my %seen = ();
##### referes to RF posiion on the csv file
#####3 the path ways
##### for 98 percent identity

my
$path_IN="/home/ubuntu/Documents/RNA_disease/database_for_balst/Matrix_data/40percent_id_2019_06_17";

##### the path for output

my $path_OUT=
"/home/ubuntu/Documents/RNA_disease/database_for_balst/Matrix_data/40percent_id_2019_06_17/without_duplication";
```



```
##### the path for input and out put
```

```
my  
$file_in="matrix_cis_regulatory_for_all_db_40_percent_identity_coverage_HSP_98_2019  
0708.xls";
```

```
##### 98 percent HSP and 40 percent identity CSV format #####
```

```
my  
$file_out="uniq_matrix_cis_regulatory_for_all_db_40_percent_identity_coverage_HSP_9  
8_20190708.xls";
```

```
##### Riboswitch 98 percent HSP and 40 percent identity CSV format #####
```

```
open ($fh_out,">","$path_OUT/$file_out") ;  
@file = io("$path_IN/$file_in")->tie->slurp;  
#@uniq = io("$path_OUT/$file_out");
```

```
foreach $line (@file) {  
print $fh_out $line unless $seen{$line}++;  
print $line unless $seen{$line}++;  
}  
close $fh_out;  
print "END normal","\n";
```

## # matrix.pl

```
#!/usr/bin/perl
```

```
use strict;  
use warnings;
```

```
# This program extract the file downloaded from RiboGap to take out all the  
AminoAcide sequences for blast
```

```
use autodieqw(:all);  
use List::AllUtilsqw( :all );  
use List::Compare;  
use IO::All ;  
use File::Slurp;  
use Data::Table;  
use Try::Tiny;  
use File::Temp qw/ tempfiletempdir /;  
use File::chmod;  
use File::Copy;  
use Text::Trim;  
use Text::Table::Tiny 0.04 qw/ generate_table /;  
use Text::Table::Any;  
use Data::Dumper;
```

```
#####initializing the variables#####
```

```
##### connecting to data base
```

```
##### open the file and take all the sequence from translation sequence#####
```

```
my @file;
my @file_fp; ##### file with Fals positive RNA from RiboGap to compare
my @line;
my $fh_out;
my $fh_error;
my $fh_error_fp;
my $line_number;
##### referes to RF posiion on the csv file
my @after_RF;
my $rna_desc;
my $rfam_id;
my $rna_type;
my $accession;
my $acc_desc;
my $gene_product;

##### referr to count alle the elements number;

my %rna_id;
my %rna_type;
my %rna_descp;
my %gene_desc;
my %accession;
my %acc_num;

##### this is just for table
my %cis_reg_table;
my %product;
my %acc_desc;
my %rfam_gene;
my %acc_count;

#####3 cis_regulatory RNA
my %cis_reg;
my $gene_start;
my $gene_end;
my $gene_strd;

##### IGR position

my $igr_start;
my $igr_end;
my $igr_strand;

##### RNA strand

my $rna_strd;
my $rna_start;
my $rna_end;

##### TABLE #####

my $table;
my $row;

##### some extra variable #####
```

```
my %count_gene;
my $gene_num;
my %acc_desc_count;
my %tmp;
my @tmp;
##### compare array
#####

my $lc;
my @intersection;
my %test;

#### This is temp path to delete later
my $path_IN="/home/samia/Documents/virulence/new_work/result_final";

##### to produce Matrix
##### PATH OUT Jan 2020 #####

#### temp path (to delete later)
my $path_OUT="/home/samia/Documents/virulence/new_work/result_final";

##### 98 percent HSP and 40 percent identity

my $file_out="matrix_riboswitch.txt";

my
$file_out_error="matrix_cis_regulatory_for_all_db_40_percent_identyt_covereage_HSP_
98_20190617_err.txt";

##### Riboswitch 98 percent HSP and 40 percent identity CSV format
#####

open ($fh_out,">",$path_OUT/$file_out) ;
open ($fh_error,">",$path_OUT/$file_out_error) ;
$line_number=1;
@file = io("$path_IN/$file_in")->tie->chomp->slurp;
foreach my $line (@file){

#### attention to change to \t+ or ", " ####

@line=split /\t+/, $line;

##### take all the element s after RF
#### take all the cis_regulatory with the same strand as gene and ncRNA

@after_RF=after_incl { $_ =~/^RF[0-9]+/ } @line;
$rfam_id=$after_RF[0];
unless ($rfam_id){

##### The case for 224 candidate #####3

if ($line=~algC/){
@after_RF=after { $_ =~algC/ } @line;
unshift @after_RF, "RF02929" ;
$rfam_id=$after_RF[0];
$rna_desc=$after_RF[-5];
```

```
splice @after_RF, -5, 1, "$rna_desc; Cis-reg";
  $rna_desc=$after_RF[-5];
  $rna_type=$after_RF[-4];
  $rna_start=$after_RF[-3];
  $rna_end=$after_RF[-2];
  $rna_strd=$after_RF[-1];
}
elseif($line=~~/pemK/){
@after_RF=after { $_ =~~/pemK/ } @line;
unshift @after_RF, "RF02913";
$rfam_id=$after_RF[0];
$rna_desc=$after_RF[-5];
splice @after_RF, -5, 1, "$rna_desc; Cis-reg";
  $rna_desc=$after_RF[-5];
  $rna_type=$after_RF[-4];
  $rna_start=$after_RF[-3];
  $rna_end=$after_RF[-2];
  $rna_strd=$after_RF[-1];
}
elseif($line=~~/maeb/){
@after_RF=after { $_ =~~/maeb/ } @line;
unshift @after_RF, "RF0maeb" ;
$rfam_id=$after_RF[0];
$rna_desc=$after_RF[-5];
splice @after_RF, -5, 1, "$rna_desc; Cis-reg";
  $rna_desc=$after_RF[-5];
  $rna_type=$after_RF[-4];
  $rna_start=$after_RF[-3];
  $rna_end=$after_RF[-2];
  $rna_strd=$after_RF[-1];
}
Elsif($line=~~/DUF1646/){
@after_RF=after { $_ =~~/DUF1646/ } @line;
unshift @after_RF, "RF03071" ;
$rfam_id=$after_RF[0];
$rna_desc=$after_RF[-5];
splice @after_RF, -5, 1, "$rna_desc; Cis-reg";
  $rna_desc=$after_RF[-5];
  $rna_type=$after_RF[-4];
  $rna_start=$after_RF[-3];
  $rna_end=$after_RF[-2];
  $rna_strd=$after_RF[-1];
}
Elsif($line=~~/malK-I/){
@after_RF=after { $_ =~~/malK-I/ } @line;
unshift @after_RF, "RF03069" ;
$rfam_id=$after_RF[0];
$rna_desc=$after_RF[-5];
splice @after_RF, -5, 1, "$rna_desc; Cis-reg";
  $rna_desc=$after_RF[-5];
  $rna_type=$after_RF[-4];
  $rna_start=$after_RF[-3];
  $rna_end=$after_RF[-2];
  $rna_strd=$after_RF[-1];
}
elseif($line=~~/narK/){
@after_RF=after{ $_ =~~/narK/ } @line;
unshift @after_RF, "RF03032" ;
$rfam_id=$after_RF[0];
```

```
$rfam_id=$after_RF[0];
$rna_desc=$after_RF[-5];
splice @after_RF, -5, 1, "$rna_desc; Cis-reg";
$rna_desc=$after_RF[-5];
$rna_type=$after_RF[-4];
$rna_start=$after_RF[-3];
$rna_end=$after_RF[-2];
$rna_strd=$after_RF[-1];
}
elsif($line=~Rothia-sucC/){
@after_RF=after { $_ =~Rothia-sucC/ } @line;
unshift @after_RF, "RF03024" ;
$rfam_id=$after_RF[0];
$rna_desc=$after_RF[-5];
splice @after_RF, -5, 1, "$rna_desc; Cis-reg";
$rna_desc=$after_RF[-5];
$rna_type=$after_RF[-4];
$rna_start=$after_RF[-3];
$rna_end=$after_RF[-2];
$rna_strd=$after_RF[-1];
}
elsif($line=~sull/){
@after_RF=after { $_ =~sull/ } @line;
unshift @after_RF, "RF03058" ;
$rfam_id=$after_RF[0];
$rna_desc=$after_RF[-5];
splice @after_RF, -5, 1, "$rna_desc; Cis-reg";
$rna_desc=$after_RF[-5];
$rna_type=$after_RF[-4];
$rna_start=$after_RF[-3];
$rna_end=$after_RF[-2];
$rna_strd=$after_RF[-1];
}
elsif($line=~terC/){
@after_RF=after { $_ =~terC/ } @line;
unshift @after_RF, "RF03067" ;
$rfam_id=$after_RF[0];
$rna_desc=$after_RF[-5];
splice @after_RF, -5, 1, "$rna_desc; Cis-reg";
$rna_desc=$after_RF[-5];
$rna_type=$after_RF[-4];
$rna_start=$after_RF[-3];
$rna_end=$after_RF[-2];
$rna_strd=$after_RF[-1];
}
else{
print $fh_error "This line has problem of RFAM id :\n", join "\t", @line, "\n";
next;
}
}
else{
$rna_desc=$after_RF[12];
$rna_type=$after_RF[13];
$rna_start=$after_RF[14];
$rna_end=$after_RF[15];
$rna_strd=$after_RF[16];
$accession= $after_RF[1];
$acc_desc= $after_RF[2];
```

```
$gene_product=$after_RF[4];
$gene_start=$after_RF[5];
$gene_end=$after_RF[6];
$gene_strd=$after_RF[7];

##### IGR position

$igr_start=$after_RF[8] ;
$igr_end=$after_RF[9];
$igr_strand=$after_RF[10];

}

##### attention for RNA_descs and RNA_type #####
##### RNA type is for all RFAMid
## RNA desc is for all nonRFAMid motif (224 motif) at the time of writing this code
### you can choose for what you are looking for
###for 224 motif you should choose rna_typ instead of rna_desc (RNA description)

# if ( $rna_desc=~/(Cis-reg[A-Za-z]?/ and $gene_strd == $rna_strd ){
# if ( $rna_desc=~/(riboswitch/ and $gene_strd == $rna_strd ){
if ( $rna_type=~/(riboswitch/ and $gene_strd == $rna_strd ){
# if ( $rna_type=~/(Cis-reg[A-Za-z]?/ and $gene_strd == $rna_strd ){
# if ( $rna_desc=~/(thermo.*)/ and $gene_strd == $rna_strd ){
#if ( $rna_desc=~/(TPP riboswitch)/ and $gene_strd == $rna_strd ){
#if ( $rna_desc=~/(NiCo riboswitch)/ and $gene_strd == $rna_strd ){
#if ( $rna_desc=~/(NiCo riboswitch)|(Glycine riboswitch)/ and $gene_strd ==
$rna_strd ){
#if ( $rna_desc=~/(TPP riboswitch)|(FMN riboswitch)|(Glycine riboswitch)/ and
$gene_strd == $rna_strd ){
#if ( $rna_desc=~/(TPP riboswitch)|(NiCo riboswitch)|(FMN riboswitch)/ and
$gene_strd == $rna_strd ){
#if ( $rna_desc=~/(TPP riboswitch)|(SAM riboswitch)/ and $gene_strd == $rna_strd
){

##### only riboswitch #####

$rna_id{$rfam_id}++;
push ( @{$product{$rfam_id}}, $gene_product );
push ( @{$accession{$rfam_id}}, $acc_desc);
push ( @{$acc_num{$rfam_id}}, $accession);
push ( @{$acc_desc{$rfam_id}}, $accession." ".$acc_desc);
push ( @{$cis_reg{$rfam_id}}, $accession." ".$acc_desc );
push ( @{$cis_reg_table{$rfam_id}}, $rna_desc, $rna_type );

#### this is for having distinct Rfam id
@{$cis_reg{$rfam_id}}=distinct (@{$cis_reg{$rfam_id}});

#### this is for having the distinct accession description
@{$accession{$rfam_id}}=distinct (@{$accession{$rfam_id}});

#### this is for having the distinct accession description number
@{$acc_desc{$rfam_id}}=distinct ( @{$acc_desc{$rfam_id}});

#### this is for having the distinct rna_desc_for table
@{$cis_reg_table{$rfam_id}}=distinct ( @{$cis_reg_table{$rfam_id}} );
```

```
##### this is for having the distinct accession_number

}
$line_number++;
}

##### cis_regulatory #####3
##### first count the gene number then do your table
#foreach my $k (sort keys %cis_reg){
foreach my $k (sort keys %acc_desc){

my $gene_num;

##### this is for the table

foreach $gene_product( distinct (@{$product{$k}})){
foreach $gene_num (@{$product{$k}}){
    $count_gene{$gene_num}++;
}

    push (@$row , [ $k, (join ";", @{$cis_reg_table{$k}}), $rna_id{$k}, $gene_product
, scalar @{$product{$k}}, $count_gene {$gene_product}, (shift @{$acc_desc{$k}})]);
    %count_gene=();
}
}

##### add the header for table #####3
#unshift (@$row, [ "Rfam_id", "RNA_description", "RNA_instance ", "gene_product",
"Gene_instance", "Accession_desc" ]);

#unshift (@$row, [ "Rfam_id", "RNA_description", "RNA_instance ", "gene_product",
"Gene_instance", "Accession", "Accession_desc", "Accession_count" ]);

#unshift (@$row, [ "Rfam_id", "RNA_description", "RNA_instance ", "gene_rna",
"gene_product", "Gene_instance" ]);

#unshift (@$row, [ "Rfam_id", "RNA_description", "RNA_instance ", "test",
"gene_product", "Gene_instance" ]);

#unshift (@$row, [ "Rfam_id", "RNA_description", "RNA_instance (total) ",
"gene_product", "Gene_instance" ]);

#unshift (@$row, [ "Rfam_id", "RNA_description", "RNA_instance (total) ",
"gene_product", "Gene_instance(total) ", "Accession_description"]);

#unshift (@$row, [ "Rfam_id", "RNA_description", "RNA_instance (total) ",
"gene_product", "Associate_gene_for_this_rfam_id", "total_found_gene" ,
"Accession_description"]);

unshift (@$row, [ "Rfam_id", "RNA_description", "RNA_instance (total) ",
"gene_product", "Associate_gene_for_this_rfam_id", "total_found_gene",
"Accession_description"]);

push @$table, @$row;
```

```
##### Print in TSV format #####
print Text::Table::Any::table(rows => $table, header_row => 1,
                               backend => 'Text::Table::TSV');
print $fh_outText::Table::Any::table(rows => $table, header_row => 1,
                                       backend => 'Text::Table::TSV');

close $fh_out;

close $fh_error;
#close $fh_error_fp;

print "END normal of Program","\n";
```



## Evaluating co-transcription of tRNAs with Ef-Tu

### Sequences of Neisseria species evaluated

#### >Neisseria\_gonorrhoeae\_F62\_cont1\_29\_whole\_genome\_shotgun\_sequence

ATGGCTAAGGAAAAATTCGAACGTAGCAAACCGCACGTAACCGTTGGCACCATCGGTACAGTTGACCATGGTAAAACCACCTGACTGCCGCTTTGACTACTA  
TTTTAGCTAAAAAATTCGGCGGCGCTGCAAAGCTTACGACCAAATCGACAACGCACCCGGAAGAAAAGCACGCGGTATTACCATTAAACCTCGCACGTAGA  
ATACGAAACCGAAACCCGCCACTACGCACACGTAGACTGTCCGGGTACGCGGACTACGTTAAAAAATGATTACCGGCGCCGACAAAATGGACGGTGCATC  
CTGGTATGTTCTGCTGCCGACGGCCCTATGCCGCAAACCCGCGAACACATCCTGCTGGCCCGTCAAGTAGGCGTACCTTACATCATCGTGTTCATGAACAAAT  
CGCAGATGGTTCGACGATGCCGAGCTGTTGGAACCTGGTTGAAATGGAATCCGCGACCTGCTGTCCAGCTACGACTTCCCGGCGCAGCAGTGCCTGATCGTACA  
AGGTTCCGCACTGAAAGCCTTGAAGGCGATGCCGCTTACGAAGAAAAAATCTTCGAACCTGGCTACCGCATTTGGACAGCTACATCCCGACTCCCGAGCGTGCC  
GTGGACAAACCATTCCTGCTGCCTATCGAAGACGTGTTCTCCATTTCCGGCCGCGGTACCGTAGTACCGGCGGTGTAGAGCGGGTATCATCCACGTTGGTG  
ACGAGATTGAAATCGTCCGCTGTAAGAAAACCCAAAAAACCCAAATCGACCAAAATCGACAACGCACCCGGAAGAAAAGCACGCGGTATTACCATTAAACCTCGCACGTGGA  
AGGCGTATTGCTGCGCGGTACCAAACGTGAAGACGTGAAGACCGGTGAGGTTGGTAAACCGGGTACTATCACTCCTCACACCAAGTTCAAAGCAGAAGTG  
TACGTATTGAGCAAAGAAGAGGGCGCGCCATACCCGTTTTTCGGCAACTACCGTCCCAATTTACTTCCGTACCCTGACGTAACCGGCGGGTTACTT  
TGGAAGAAAGGTGTGGAATGGTAATGCCGGGTGAGAACGTAAACCATTAAGTGAAGAACTGATTGCGCCTATCGCTATGGAAGAAGGCTGCGCTTTGCGATTTCG  
CGAAGGCGCGCTACCGTGGGTGCCGGCTGGTTTTCTTCTGTTATCGCTTAA

#### >NC\_003112.2\_Neisseria\_meningitidis\_MC58\_NMB0124\_elongation\_factor\_Tu

ATGGCTAAGGAAAAATTCGAACGTAGCAAACCGCACGTAACCGTTGGCACCATCGGTACAGTTGACCATGGTAAAACCACCTGACTGCCGCTTTGACTACTA  
TTTTGGCTAAAAAATTCGGCGGTGCTGCAAAGCTTACGACCAAATCGACAACGCACCCGGAAGAAAAGCACGCGGTATTACCATTAAACCTCGCACGTGGA  
ATACGAAACCGAAACCCGCCACTACGCACACGTAGACTGTCCGGGGCAGCGGACTACGTTAAAAAATGATTACCGGCGCCGACAAAATGGACGGTGCATC  
CTGGTATGTTCCGCGACGCGGCTATGCCGCAAACCCGCGAACACATCCTGCTGGCCCGCAAGTAGGCGTACCTTACATCATCGTGTTCATGAACAAAT  
GCGACATGGTTCGACGATGCCGAGCTGTTGGAACCTGGTTGAAATGGAATCCGCGACCTGCTGTCCAGCTACGACTTCCCGGCGGATGACTGCCGATTGTACA  
AGGTTCCGCACTGAAAGCCTTGAAGGCGATGCCGCTTACGAAGAAAAAATCTTCGAACCTGGCTACCGCATTTGGACAGCTACATCCCGACTCCCGAGCGGAC  
GTGGACAAACCGTTCTGCTGCCTATCGAAGACGTGTTCTCCATTTCCGGCCGCGGTACAGTAGTAAACCGGCGGTGTAGAGCGGGTATCATCCACGTTGGTG  
ACGAGATTGAAATCGTCCGCTGTAAGAAAACCCAAAAAACCACTTGTACCGGTGTTGAAATGTTCCGCAAACTGCTGGACGAAGGTCAGGCGGGGACAACTG  
AGGCGTATTGCTGCGCGGTACCAAACGTGAAGACGTGGAACCGGTGAGGTTGGTAAACCGGGTACTATCACTCCTCACACCAAAATCAAAGCAGAAGTA  
TACGTACTGAAAGAAAGAGGGTGGTCCGTCACACTCCGTTCTTCGGCAACTACCGTCCGCAATTTACTTCCGTACCCTGACGTAACCGGCGGGTTACTT  
TGGAAGAAGGTGTAGAAATGGTAATGCCGGGTGAAAACGTAAACCATTAAGTGAAGAACTGATTGCGCCTATCGCTATGGAAGAAGGCTGCGCTTTGCGATTTCG  
CGAAGGCGCGCTACCGTGGGTGCCGGCTGGTTTTCTTCTGTTATCGCTTAA

#### >NZ\_CP020452.2\_Neisseriasicca\_locus\_tag\_A6J88\_RS18225\_Eftu

ATGGCTAAGGAAAAATTTGAACGTAGCAAACCGCACGTAACCGTTGGCACCATCGGTACAGTTGACCATGGTAAAACCACCTAAGTGTGCTTTGACTACTA  
TTTTGGCTAAAAAATTCGGCGGTGCTGCAAAGCTTACGACCAAATCGACAACGCATCCCGGAAGAAAAGCCGCGGTATTACCATTAAACCTCACACGTAGA  
ATACGAAACCGAAACCCGCCACTACGCACACGTAGACTGTCCGGGTACGCGGACTACGTTAAAAAATGATTACCGGTGCCGACAAAATGGACGGCGCAATC  
TTGGTATGTTCTGCTGCGGACGGTCTATGCCGCAAACCCGCGAACACATCCTGTTGGCCCGTCAAGTAGGTTGACCTTACATCATCGTGTTCATGAACAAAT  
GCGACATGGTTCGACGATGCCGAAATGTTGGAACCTGGTTGAAATGGAATCCGCGACTTGTGTCAAGCTACGACTTCCCTGGTACGACTGCCGATTGTACA  
AGGTTCTGCACTGAAAGCCTTGAAGGCGATGCCGCTTACGAAGAAAAAATCTTCGAACCTGGCTGCCGATTTGGACAGCTACATCCCGACTCCCGAGCGGTGCC  
GTAGACAAACCGTTCTGTTGCTGTAAGACGTATTCCTCATCTCCGCTGCTGGTACAGTAGTAAACCGGCGGTGTAGAGCGGGTGTATCCACGTTGGTG  
ACGAGATCGAAATCGTAGGCTGTAAGAAAACCCAAAAAACCACTTGTACCGGTGTTGAAATGTTCCGCAAACTGCTGGACGAAGGTCAGCAGGTGACAACGT  
AGGCGTATTGCTGCGCGGTACCAAACGTGAAGAAGTGAAGACCGGTCAAGTATTGGCTAAACCGGGTACCATCACTCCGCACACCAAAATCAAAGCAGAAGTG  
TACGTATTGAGCAAAGAAGAGGGTGGTCCGTCATACTCCGTTCTTCGCTAACTACCGTCCCAATTTACTTCCGTACTACCGACGTAACCGGCGGGTTACTT  
TGGAAGAAGGTGTAGAAATGGTTATGCCTGGTGAAGACGTAGCCATCACTGTTGAGATGTTCCGCAAACTGCTGGACGAAGGTCAGGCGGGTGAACCTG  
CGAAGGTGGCCGTACCGTAGGTGACGGCGTGGTTTTCTTCTATCATCGCTTAA

#### >NZ\_CP007726.1\_Neisseriaelongata\_subsp.\_glycolytica\_ATCC\_29315\_locus\_tag\_NELON\_RS0103\_elongation\_factor\_Tu

ATGGCAAAGGAAAAATTTGAACGTAGCAAACCGCACGTAACCGTTGGCACCATCGGTACAGTTGACCATGGTAAAACCACCTCTGACTGCTGCTTTGACTACTA  
TTTTGGCTAAAAAATTCGGTGGTGTGCAAAGCTTACGATCAAATCGACAACGCATCCCGGAAGAAAAGCCGCGGTATTACCATTAAACCTCACACGTAGA  
ATACGAAACCGAAACCCGCCACTACGCACACGTAGACTGTCCGGGTACGCGGACTACGTTAAAAAATGATTACCGGTGCCGACAAAATGGACGGCGCAATC  
TTGGTATGTTCCGCTGCTGACGGTCTATGCCGCAAACCCGCGAACACATCCTGTTGGCCCGCAAGTAGGCGTACCTTACATCATCGTGTTCATGAACAAAT  
GCGACATGGTTCGACGATGCCGAGCTGTTGGAACCTGGTTGAAATGGAATCCGCGACTTGTGTCAAGCTACGACTTCCAGGTGATGACTGCCGATCGTACA  
AGGTTCCGCACTGAAAGCCTTGAAGGCGACGCACTTACGAAGAAAAAATCTTCGAACCTGGCTGCCGATTTGGATAGCTACATCCCGACTCCTGAGCGTGCC  
GTGGACAAACCGTTCTGTTGCCTATCGAAGACGTATTCCTCATCTCCGGTCTGGTACAGTAGTAAACCGGTCGTGTAGAGCGTGGTGTATCCACGTTGGTG  
ACGAGATCGAAATCGTAGGCTGTAAGAAAACCCAAAAAACCACTTGTACCGGTGTTGAAATGTTCCGCAAACTGCTGGACGAAGGTCAGCAGGTGACAACGT  
AGGCGTATTGCTGCGCGGTACCAAACCGGAAGAAGTGAAGACCGGTCAAGTATTGGCTAAACCGGGTACCATCACTCCGCACACCAAAATCAAAGCAGAAGTG  
TACGTATTGAGCAAAGAAGAGGGTGGTCCGTCATACTCCGTTCTTCGCTAACTACCGTCCCAATTTACTTCCGTACTACCGACGTAACCGGCGGGTTACTT  
TGGAAGAAGGTGTAGAAATGGTTATGCCTGGTGAAGACGTAGCCATCACTGTTGAGATGTTCCGCAAACTGCTGGACGAAGGTCAGGCGGGTGAACCTG  
CGAAGGTGGCCGTACCGTAGGTGACGGCGTGGTTTTCTTCTATCATCGCTTAA

Table S1 : The primer sequences used for Northern blot

| Sequence ID | Sequence                       |
|-------------|--------------------------------|
| Eftu_rev_5' | TTGCAGCGCCGCCGAATTTTTTAGCTAAAA |
| tRNA_Tyr    | TGCCCCCTTTGACCGCTCGGGAATCCCTCC |
| tRNA_Gly    | TGGAGCGGGTGAAGGGAATCGAACCTCAC  |
| tRNA_Thr    | TGGTGCCCATGGGCAGATTTGAACTGCCGA |
| tmRNA       | CCCGTATGCCCGCATCTGCTTCGCAACCC  |

Figure S1

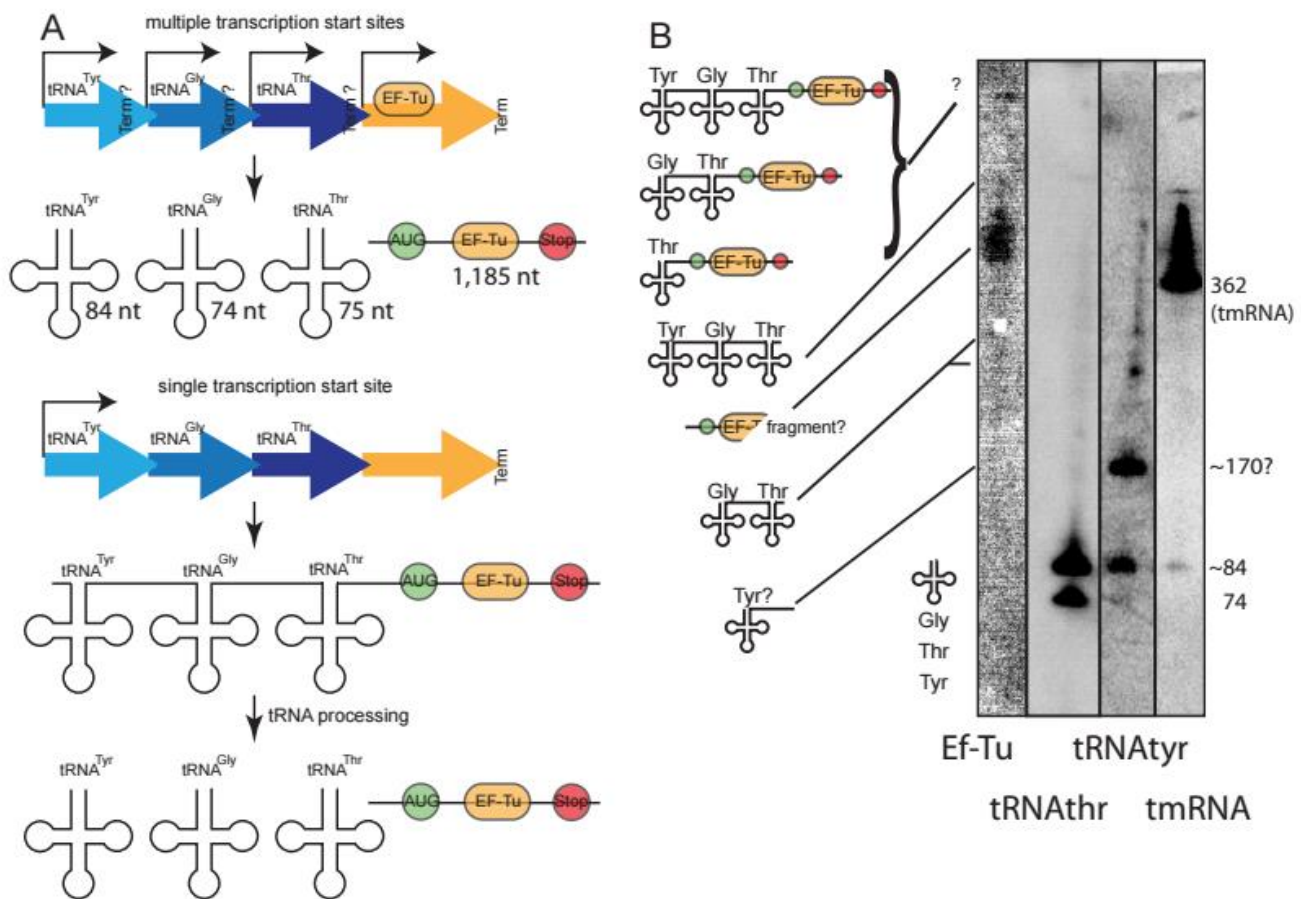

**Figure S1. Co-transcription of tRNAs upstream of Ef-Tu. A)** Potential outcomes of transcription. **B)** Co-transcription of Ef-Tu and tRNAs upstream was evaluated by northern blot. Total RNA from *Neisseria gonorrhoeae* was used and probed with sequences in table S1 for the RNAs as indicated under the Northern image. Detection of transcripts with, presumably, multiple tRNAs could be performed, but not with Ef-Tu. This is probably due to the rapid processing of tRNAs. The tmRNA was used as a size control (it should be 362 bases).

## Figure S2

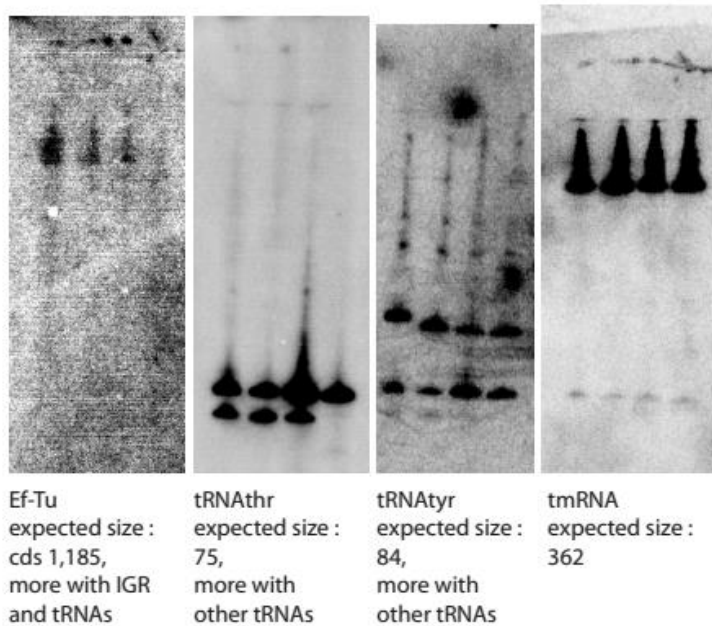

**Figure S2. Full Northern blots of figure S1.** Probed were used in the same order presented in figure. Wells correspond to total RNA from: *Neisseria gonorrhoeae*, *Neisseria meningitidis*, *Neisseria sicca* and *Neisseria elongata*, in this order. This is a representative membrane (out of three experiments).

In summary, while very weak bands corresponding to transcripts not fully processed with the tRNA<sup>thr</sup> and tRNA<sup>tyr</sup> probes, no convincing band could be detected that would have had the expected size of the Ef-Tu mRNA + one or more tRNAs still part of the same transcript. We have also tried amplifying such transcripts by RT-PCR without success. These results indicate that if Ef-Tu is co-transcribed with tRNAs (as suggested by this genetic arrangement), the transcript is quickly processed in its individual genes (as it is also suggested by the overwhelming intensity of bands corresponding to processed tRNA compared to the bands putatively comprising two or three tRNAs). Nevertheless, this does not preclude that Ef-Tu may use one of the tRNAs' promoter(s) for its transcription.

(Tables S2, S3, S4, S5 and S6 are in separate excel files.)

## tRNAs upstream of VFs (and homologs)

(Table S6 is in a separate excel file.)

### Additional methodology details

- Profile of tRNAs upstream of virulence genes:

We evaluated the distribution of tRNAs upstream of the virulence genes, which were compared to 100 genes randomly taken from the genome of the strain *Escherichia coli* K12 MG1655. The 100 genes were randomly selected with Excel's RAND () function in three replicas

For each replica, the 5' UnTranslated Region (5'UTR) were extracted from the Ribogap database (<http://ribogap.iaf.inrs.ca>) following mysql requests (see supplementary material, previous section).

- Method:

- o 5'UTRs sequences: extraction from the ribogap database (see the mysql scripts in the additional material)

- o Analysis with tRNAscan-SE (Chan and Lowe, 2019) (<http://lowelab.ucsc.edu/tRNAscan-SE/>):

tRNAscan is a tool for detecting tRNA genes and predicting function from genomic sequences. We used the locally installed source code version to make our predictions. The configuration parameters were left by default (see material additional).

Table S7: Virulence genes with pseudo-tRNA predicted in their 5'UTR

| Gene  | Nbr pseudo-tRNA | nbr 5'UTR |
|-------|-----------------|-----------|
| acpP1 | 1               | 4650      |
| aroQ  | 1               | 2499      |
| clpP  | 14              | 412       |
| cysM  | 1               | 2218      |
| gtrA  | 3               | 143       |
| mcp2  | 2               | 74        |
| nadA  | 5               | 2187      |
| pfoR  | 1               | 88        |
| pgmB  | 1               | 613       |
| pyrE  | 1               | 4989      |
| secE  | 1               | 8284      |
| tig   | 1               | 6718      |
| tuf   | 1               | 9187      |
| tufB  | 1               | 596       |
| vacB  | 1               | 625       |

Table S8: Overall tRNAscan results

|                                | Random genes |           |           |       | Standard deviation | Virulence genes |
|--------------------------------|--------------|-----------|-----------|-------|--------------------|-----------------|
|                                | Replica 1    | Replica 2 | Replica 3 | Mean  |                    |                 |
| <i>5'UTRs</i>                  | 69456        | 86744     | 84256     | 80152 | 9346.17            | 1345678         |
| <i>5'UTRs with tRNA</i>        | 2074         | 2124      | 2375      | 2191  | 161.3              | 3971            |
| <i>5'UTRs with pseudo tRNA</i> | 6            | 36        | 54        | 32    | 24.25              | 35              |
| <i>genes</i>                   | 100          | 100       | 100       | 100   | 0                  | 7042            |
| <i>genes with tRNA</i>         | 57           | 60        | 47        | 55    | 6.8                | 426             |
| <i>genes with pseudo tRNA</i>  | 1            | 4         | 7         | 4     | 3                  | 15              |

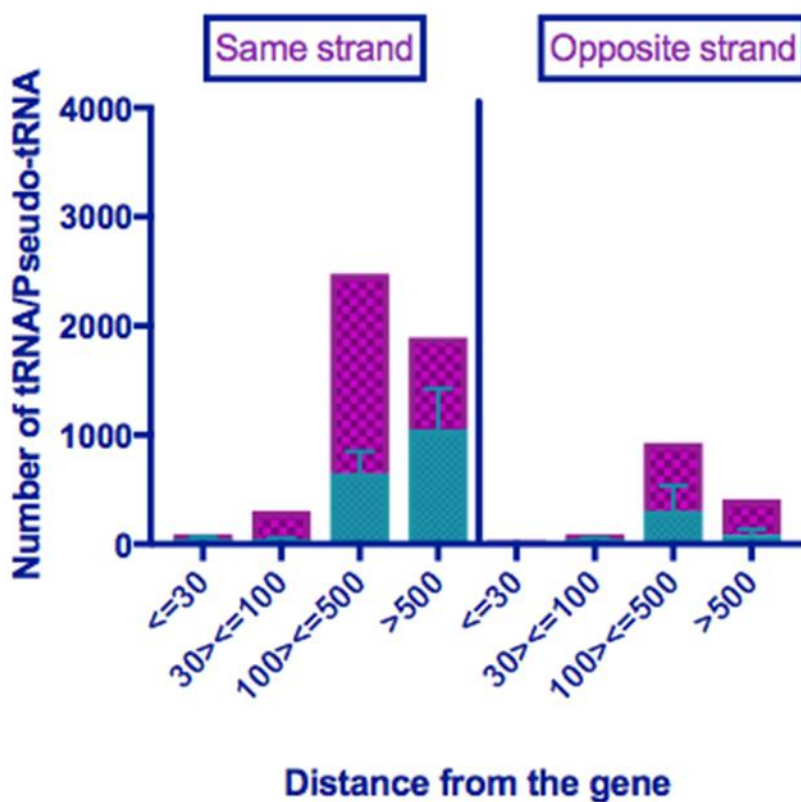

Figure S3. Distribution and orientation of tRNA (and pseudo tRNA) sequences upstream of genes.

Number of tRNAs upstream of VFs (or homologs) in purple, number of tRNAs upstream of randomized controls in turquoise.

While there are numerous tRNAs found upstream of VFs (and homologs), they are not more abundant, proportionally, to the randomized controls. Nevertheless, no particular general trend was expected and the significance of these genetic arrangements, especially for those that are very close to the coding sequence, merits inspection on a case by case basis.

## Transcription terminators

(Tables S9 and S10 are in separate excel files.)

Table S11 : The genes which have rho independent terminator

| <b>locus_tag</b> | <b>Gene</b>                       | <b>Start</b> | <b>end</b> |
|------------------|-----------------------------------|--------------|------------|
| BSU04490         | putative ABC transporter          | 502668       | 502883     |
| BSU06360         | GMP synthetase                    | 692609       | 692701     |
| BSU07260         | lipoteichoic acid synthase        | 796130       | 796224     |
| BSU09590         | putative membrane protein         | 1035409      | 1035538    |
| BSU18090         | subunit B of DNA topoisomerase IV | 1933177      | 1933398    |
| lmo0517          | Phosphoglycerate mutase           | 552417       | 552315     |
| lmo2187          | Protein of unknown function       | 2275362      | 2275261    |
| EF1147           | CTP synthetase                    | 1115883      | 1115958    |

These locus\_tag have Rho-independent transcription terminators RiTTs just upstream of VFs (or VF homologs) as indicated by our search. They also correspond to experimentally determined premature transcription termination sites in *Listeria monocytogenes* as determined by Term-seq (Dar et al., 2016). This highlights the usefulness of using the RiTTs and RTTs to quickly survey potential transcription-mediated mechanisms of gene regulation.
